# Supplementary material for: Genome-wide analysis reveals distinct patterns of epigenetic features in long non-coding RNA loci
Source: PubMed Central journal article supplement — Nucleic Acids Res. 2012 Aug 24;40(20):10018–31. doi: 10.1093/nar/gks776 (PMC3488231; doi:10.1093/nar/gks776), 2012-08-24

# **Supplementary Information**

- 1. Supplementary Data Legends**
- 2. Supplementary Figures**
- 3. Supplementary Tables**
- 4. Supplementary File 1**
- 5. Supplementary File 2**

## SUPPLEMENTARY DATA LEGENDS

Supplementary Figure 1: Pattern of DNA methylation within 5 kb up and downstream of the TSS of all lncRNA, genic lncRNA (lncRNA falling within 1kb upstream of TSS to 1kb downstream of TES of mRNA coding region) and lncRNA genes falling outside genic regions (non genic), in Brain germinal matrix tissue (A), Brain frontal cortex (B), H1 cell (C) and PBMCs (D).

Supplementary Figure 2: Association of average histone modification density around TSS with gene expression in H1 cells. (A), (B) represents the H3K4me3 density around TSS of highly / lowly expressed protein coding and lncRNA genes respectively. (C), (D) represents the H3K36me3 density around TSS of highly / lowly expressed protein coding and lncRNA genes respectively. (E), (F) represents the H3K27me3 density around TSS of highly / lowly expressed protein coding and lncRNA genes respectively. (G), (H) represents the H3K9me3 density around TSS of highly / lowly expressed protein coding and lncRNA genes respectively. Peak summit count in 100bp sliding window was normalized by dividing count with total number of genes in that category. The plots were further smoothed by taking a moving average of 5.

Supplementary Figure 3: Average density of H3K4me3 and H3k36me3 density around the TSS of various sub categories of lncRNA genes. (A) Represents the H3K4me3 density around TSS four different sub categories of lncRNA genes in different cell and tissue types. (B) Represents the H3K36me3 density around TSS four different sub categories of lncRNA genes in different cell and tissue types.

Supplementary Figure 4: Distribution of ORegAnno regulatory sites around 5kb upstream and downstream from the TSS of protein coding and lncRNA genes.

Supplementary Table 1: Showing the details of the raw and processed data.

Supplementary Table 2: Distribution of the H3K4me3, H3K9me3 and H3K27me3 histone modifications across the CGI present at the TSS of protein coding and lncRNA genes. Each value is the ratio of the count in each interval by total number of genes in that category. (A)

Count of histone modification in each category. (B) Normalised distribution of histone modification in each category.

Supplementary Table 3: Global distribution of the H3K4me3, H3K9me3, H3K27me3, H3K36me3 histone modifications and DNA methylation around  $\pm 2$ Kb of the TSS of protein coding and lncRNA genes in all datasets analysed. Each value represents the ratio of the number of genes having the modification to the total number of genes. (A) Count of histone modification in each category. (B) Percentage distribution of histone modification in each category. (C) Number of genes having at least one epigenetic mark in three datasets.

Supplementary Table 4: Details of the state of the datasets present in the NIH Roadmap Epigenomics Project Data Listings downloaded at the time of data analysis.

Supplementary File 1: Venn diagram showing the coexistence of two or more of these histone modifications at 2kb up or down stream of TSS of lncRNA and mRNA coding regions in different cell and tissue types.

Supplementary File 2: File containing UCSC images showing mapping of the epigenetic marks around TSS of a few regions including housekeeping genes and some lncRNA genes.

## Supplementary Figure 1

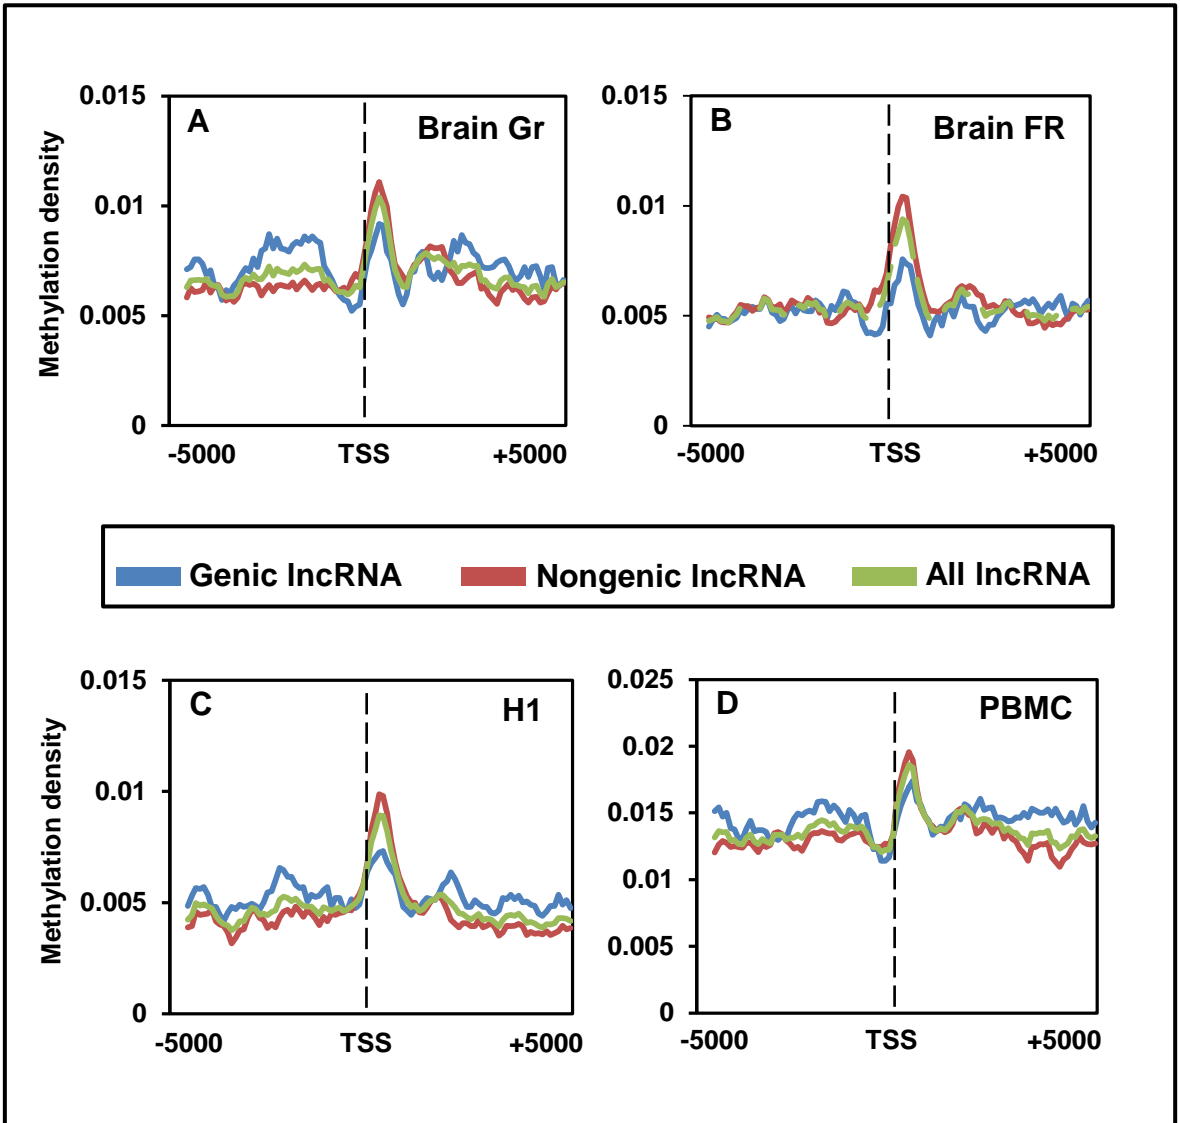

## Supplementary Figure 2 A-D

### H3K4me3

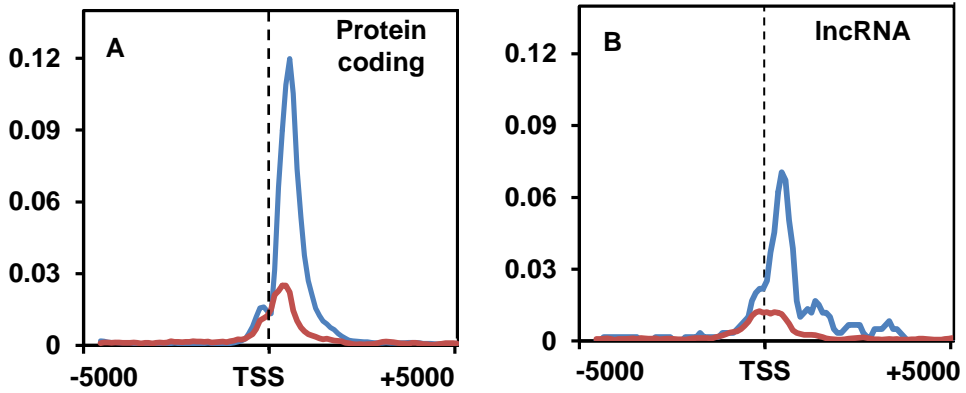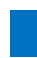

Highly Expressed

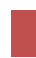

Lowly Expressed

### H3K36me3

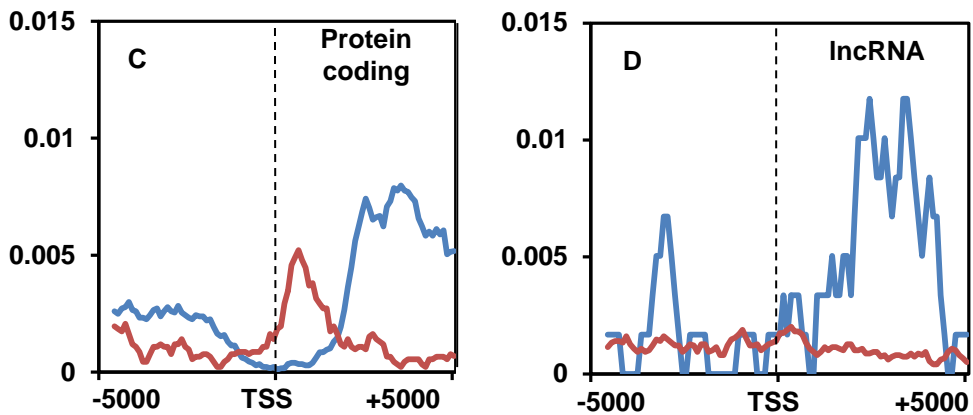

# Supplementary Figure 2 E-G

## H3K27me3

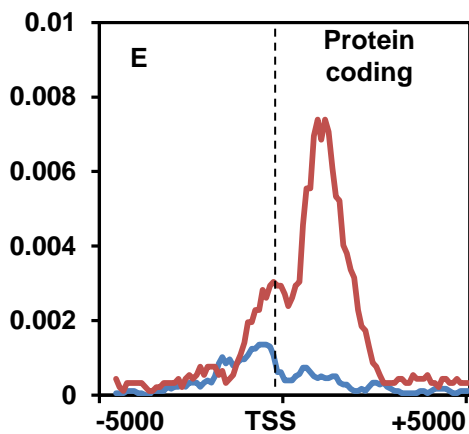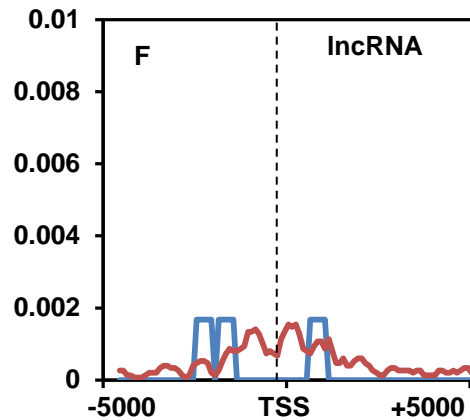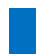

Highly Expressed

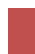

Lowly Expressed

## H3K9me3

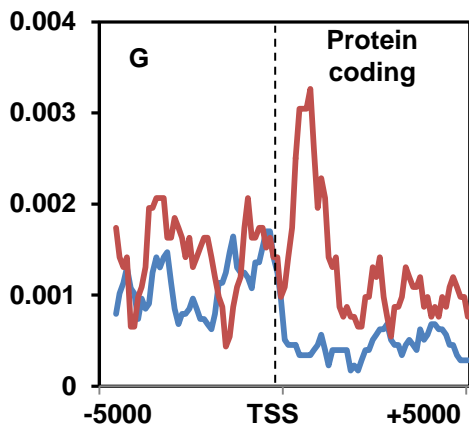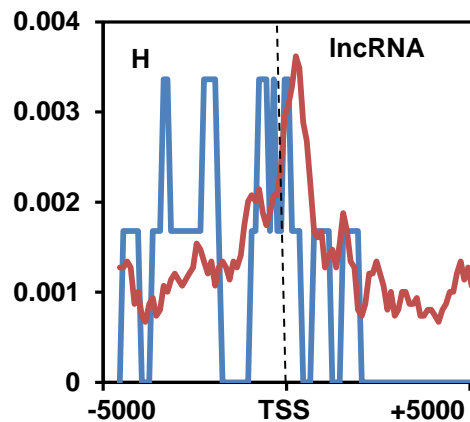

# Supplementary Figure 3A

A

## H3K4me3

■ lincRNA   ■ antisense   ■ process transcript   ■ sense intronic

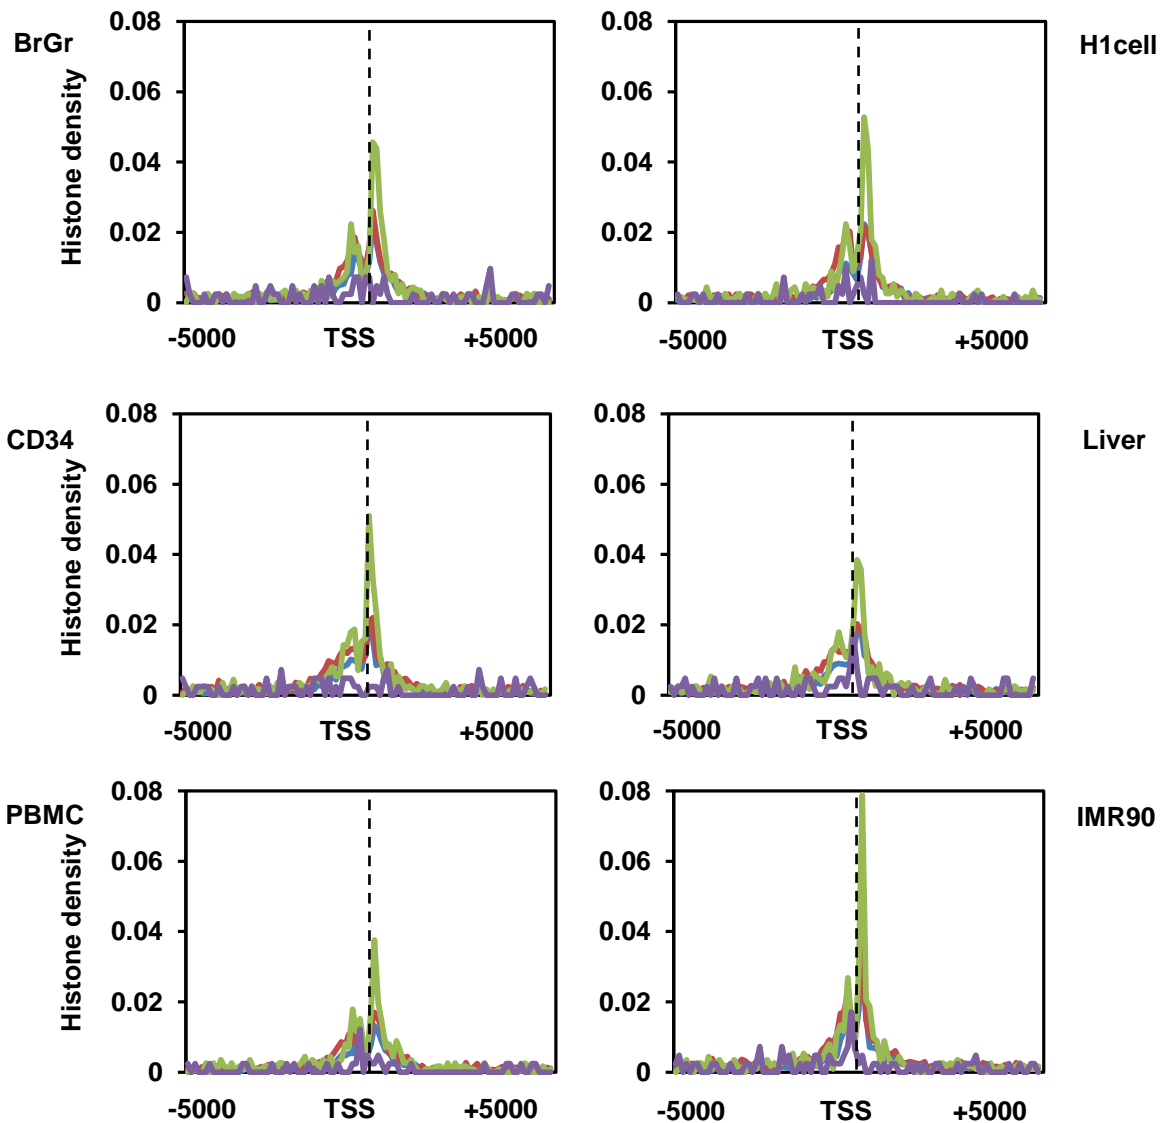

# Supplementary Figure 3B

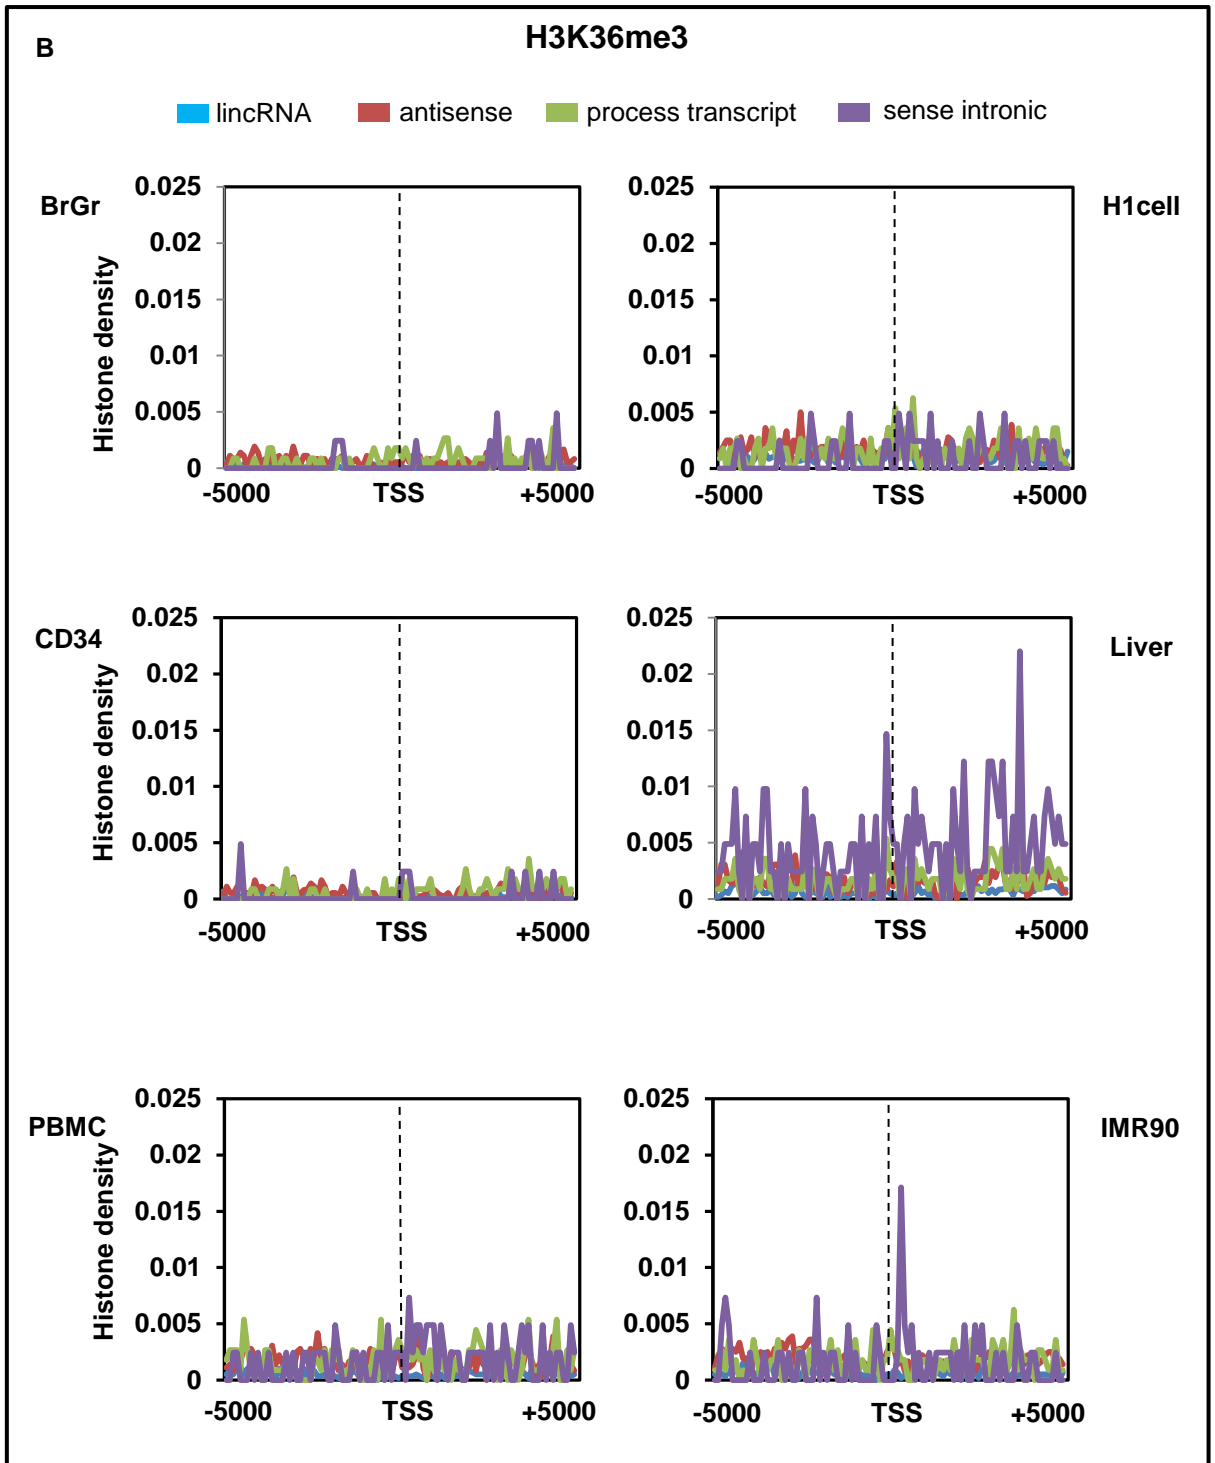



## Supplementary Figure 4

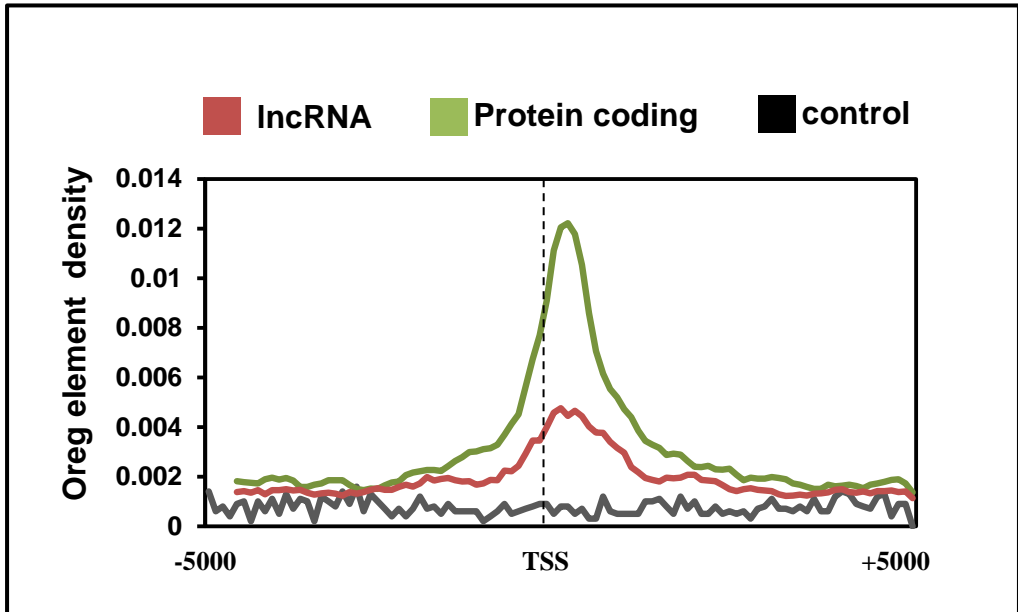

**Supplementary Table 1.**

| <b>Datasets</b>                     | <b>Number of entries</b> |
|-------------------------------------|--------------------------|
| hg19_refseq_genes                   | 40845                    |
| hg19_refseq_exons                   | 394627                   |
| hg19_refseq_introns                 | 353782                   |
| Human CpG islands                   | 28691                    |
| OregAnno data points                | 23089                    |
| H1_expressed_gene_fpkms             | 51653                    |
| Brain_expressed_gene_fpkms          | 51652                    |
| gencode v9 lncRNA transcript count  | 18878                    |
| gencode v9 lncRNA exon              | 67935                    |
| gencode v9 lncRNA gene              | 11004                    |
| mRNA coding region count            | 20012                    |
| Histone_Br_H3K4me3                  | 24888                    |
| Histone_H1_H3K4me3                  | 21498                    |
| Histone_H1_H3K27me3                 | 4788                     |
| Histone_H1_H3K9me3                  | 43128                    |
| Histone_H1_H3K36me3                 | 25996                    |
| Histone_IMR90_H3K4me3               | 33148                    |
| Histone_IMR90_H3K27me3              | 24929                    |
| Histone_IMR90_H3K9me3               | 64601                    |
| Histone_IMR90_H3K36me3              | 25488                    |
| Histone_BrGr_H3K4me3                | 25417                    |
| Histone_BrGr_H3K27me3               | 13468                    |
| Histone_BrGr_H3K9me3                | 33568                    |
| Histone_BrGr_H3K36me3               | 6810                     |
| Histone_CD34_H3K4me3                | 25363                    |
| Histone_CD34_H3K27me3               | 3871                     |
| Histone_CD34_H3K9me3                | 27573                    |
| Histone_CD34_H3K36me3               | 5240                     |
| Histone_Liver_H3K4me3               | 32781                    |
| Histone_Liver_H3K27me3              | 4218                     |
| Histone_Liver_H3K9me3               | 54372                    |
| Histone_Liver_H3K36me3              | 22449                    |
| Histone_PBMC_H3K4me1                | 18172                    |
| Histone_PBMC_H3K27me3               | 33094                    |
| Histone_PBMC_H3K9me3                | 27243                    |
| Histone_PBMC_H3K36me3               | 26657                    |
| Methylation_Brain_Frontal_Cortex    | 128607                   |
| Methylation_Brain_Germinal_Matrix   | 163597                   |
| Methylation_PBMC                    | 354811                   |
| Methylation_H1                      | 107372                   |
| H1_mRNA_coding_region (Mean + SD)   | 3532                     |
| H1_mRNA_coding_region (Mean - SD)   | 1839                     |
| H1_lncRNA_coding_region (Mean + SD) | 119                      |
| H1_lncRNA_coding_region (Mean - SD) | 2983                     |
| Br_mRNA_coding_region (Mean + SD)   | 4624                     |
| Br_mRNA_coding_region (Mean - SD)   | 1415                     |
| Br_lncRNA_coding_region (Mean + SD) | 171                      |
| Br_lncRNA_coding_region (Mean - SD) | 3665                     |

**Supplementary Table 2. (A)**

|                   | PROTEIN CODING GENES |                 |                  |                  |                 |                 |                  |                  | LncRNA GENES    |                 |                  |                  |                 |                 |                  |                  |
|-------------------|----------------------|-----------------|------------------|------------------|-----------------|-----------------|------------------|------------------|-----------------|-----------------|------------------|------------------|-----------------|-----------------|------------------|------------------|
|                   | With CGI             |                 |                  |                  | Without CGI     |                 |                  |                  | With CGI        |                 |                  |                  | Without CGI     |                 |                  |                  |
|                   | H3<br>K4<br>me3      | H3<br>K9<br>me3 | H3<br>K27<br>me3 | H3<br>K36<br>me3 | H3<br>K4<br>me3 | H3<br>K9<br>me3 | H3<br>K27<br>me3 | H3<br>K36<br>me3 | H3<br>K4<br>me3 | H3<br>K9<br>me3 | H3<br>K27<br>me3 | H3<br>K36<br>me3 | H3<br>K4<br>me3 | H3<br>K9<br>me3 | H3<br>K27<br>me3 | H3<br>K36<br>me3 |
| BRAIN<br>GERMINAL | 11963                | 168             | 8292             | 163              | 1202            | 124             | 527              | 75               | 2128            | 59              | 1386             | 52               | 582             | 227             | 154              | 98               |
| CD34              | 11730                | 287             | 906              | 125              | 1464            | 139             | 146              | 50               | 2065            | 75              | 166              | 31               | 573             | 238             | 69               | 71               |
| H1                | 12197                | 597             | 1738             | 959              | 1062            | 313             | 167              | 204              | 2156            | 174             | 345              | 252              | 402             | 480             | 84               | 323              |
| IMR90             | 11724                | 1319            | 1640             | 665              | 1402            | 527             | 643              | 219              | 2059            | 333             | 334              | 148              | 770             | 694             | 430              | 329              |
| LIVER             | 11097                | 384             | 313              | 249              | 1663            | 295             | 97               | 195              | 1907            | 94              | 61               | 74               | 719             | 427             | 290              | 60               |
| PBMC              | 9301                 | 217             | 2939             | 232              | 994             | 142             | 835              | 162              | 1537            | 69              | 58               | 623              | 360             | 217             | 330              | 488              |

Number of genes having the histone modifications.

**(B)**

|                   | <b>H3K4me3</b> | <b>H3K9me3</b> | <b>H3K27me3</b> | <b>H3K36me3</b> |                                  |
|-------------------|----------------|----------------|-----------------|-----------------|----------------------------------|
| BRAIN<br>GERMINAL | 3.5711         | 0.0382         | 4.6713          | 0.1816          | Protein<br>Coding with<br>CGI    |
| CD34              | 3.5090         | 0.0812         | 1.7758          | 0.1810          |                                  |
| H1                | 4.3364         | 0.1064         | 2.8428          | 0.2799          |                                  |
| IMR90             | 2.6835         | 0.1589         | 0.5043          | 0.1980          |                                  |
| LIVER             | 2.5902         | 0.0543         | 0.5632          | 0.0842          |                                  |
| PBMC              | 3.9627         | 0.0610         | 0.6738          | 0.0660          |                                  |
| BRAIN<br>GERMINAL | 0.6922         | 0.0541         | 0.5727          | 0.1612          | Protein<br>Coding<br>without CGI |
| CD34              | 0.8449         | 0.0738         | 0.5521          | 0.1397          |                                  |
| H1                | 0.7231         | 0.1062         | 0.5105          | 0.1149          |                                  |
| IMR90             | 0.6191         | 0.1194         | 0.3775          | 0.1258          |                                  |
| LIVER             | 0.7425         | 0.0794         | 0.3366          | 0.1271          |                                  |
| PBMC              | 0.8006         | 0.0763         | 0.3693          | 0.0890          |                                  |
| BRAIN<br>GERMINAL | 3.1228         | 0.0656         | 3.8385          | 0.2848          | LncRNA<br>with CGI               |
| CD34              | 3.0368         | 0.1015         | 1.5995          | 0.2207          |                                  |
| H1                | 3.7407         | 0.1505         | 2.6876          | 0.3616          |                                  |
| IMR90             | 2.3169         | 0.1923         | 0.4997          | 0.2166          |                                  |
| LIVER             | 2.1699         | 0.0645         | 0.5394          | 0.1230          |                                  |
| PBMC              | 3.1548         | 0.0945         | 0.0654          | 0.8717          |                                  |
| BRAIN<br>GERMINAL | 0.2751         | 0.0812         | 0.1374          | 0.1729          | LncRNA<br>without CGI            |
| CD34              | 0.2714         | 0.1037         | 0.2142          | 0.1627          |                                  |
| H1                | 0.2247         | 0.1337         | 0.2108          | 0.1493          |                                  |
| IMR90             | 0.2791         | 0.1291         | 0.2072          | 0.1551          |                                  |
| LIVER             | 0.2635         | 0.0944         | 0.8261          | 0.0321          |                                  |
| PBMC              | 0.2380         | 0.0957         | 0.1198          | 0.2200          |                                  |

Each value = (Number of entries in a category / Total number of entries) x 100000

**Supplementary Table 3. (A)**

|                       | PROTIEN CODING GENES |         |          |          | LncRNA GENES |         |          |          |
|-----------------------|----------------------|---------|----------|----------|--------------|---------|----------|----------|
|                       | H3K4me3              | H3K9me3 | H3K27me3 | H3K36me3 | H3K4me3      | H3K9me3 | H3K27me3 | H3K36me3 |
| <b>BRAIN GERMINAL</b> | 13165                | 292     | 8819     | 238      | 2710         | 286     | 1540     | 150      |
| <b>CD34</b>           | 13194                | 426     | 1052     | 175      | 2639         | 313     | 235      | 102      |
| <b>H1</b>             | 13259                | 910     | 1905     | 1163     | 2558         | 654     | 429      | 575      |
| <b>IMR90</b>          | 13126                | 1846    | 2283     | 884      | 2829         | 1027    | 764      | 477      |
| <b>LIVER</b>          | 12760                | 679     | 410      | 444      | 2626         | 521     | 121      | 364      |
| <b>PBMC</b>           | 10295                | 359     | 3774     | 394      | 1897         | 286     | 1111     | 388      |

Number of genes having the histone modification

**(B)**

|                       | PROTIEN CODING GENES |         |          |          | LncRNA GENES |         |          |          |
|-----------------------|----------------------|---------|----------|----------|--------------|---------|----------|----------|
|                       | H3K4me3              | H3K9me3 | H3K27me3 | H3K36me3 | H3K4me3      | H3K9me3 | H3K27me3 | H3K36me3 |
| <b>BRAIN GERMINAL</b> | 65.79                | 1.46    | 44.07    | 1.19     | 24.63        | 2.60    | 13.99    | 1.36     |
| <b>CD34</b>           | 65.93                | 2.13    | 5.26     | 0.87     | 23.98        | 2.84    | 2.14     | 0.93     |
| <b>H1</b>             | 66.26                | 4.55    | 9.52     | 5.81     | 23.25        | 5.94    | 3.90     | 5.23     |
| <b>IMR90</b>          | 65.59                | 9.22    | 11.41    | 4.42     | 25.71        | 9.33    | 6.94     | 4.33     |
| <b>LIVER</b>          | 63.76                | 3.39    | 2.05     | 2.22     | 23.86        | 4.73    | 1.10     | 3.31     |
| <b>PBMC</b>           | 51.44                | 1.79    | 18.86    | 1.97     | 17.24        | 2.60    | 10.10    | 3.53     |

Percentage = (Number of entries in a category / Total number of entries) x 100

**(C)**

|                       | PROTIEN CODING GENES | LncRNA GENES |
|-----------------------|----------------------|--------------|
| <b>BRAIN GERMINAL</b> | 15634                | 5357         |
| <b>H1</b>             | 15387                | 4771         |
| <b>PBMC</b>           | 16382                | 6974         |

Number of genes having at least one epigenetic mark (DNA Methylation, H3K4me3, H3K9me3, H3K27me3 and H3K36me3) in  $\pm$  2kb of the TSS

**Supplementary Table 4.**

| <b>Dataset in NIH Roadmap Epigenomics Project Data Listings</b> | <b>Criteria based on which data was taken or left (based on Embargo date, presence of H3K4me3, H3K9me3, H3K27me3, H3K36me3 modification at the time of data analysis)</b> |
|-----------------------------------------------------------------|---------------------------------------------------------------------------------------------------------------------------------------------------------------------------|
| Embryonic stem cells                                            | H1 cells taken as one of the representative data                                                                                                                          |
| CD34 primary cells                                              | Taken                                                                                                                                                                     |
| Adipose                                                         | Partial dataset available – Not taken                                                                                                                                     |
| Adrenal gland                                                   | Partial dataset available – Not taken                                                                                                                                     |
| Bone marrow                                                     | Derived cells - Not taken                                                                                                                                                 |
| Brain Tissue                                                    | One representative data set taken                                                                                                                                         |
| Small Intestine regions                                         | Partial dataset available – Not taken                                                                                                                                     |
| Kidney                                                          | Partial dataset available – Not taken                                                                                                                                     |
| Muscle cells                                                    | Partial dataset available – Not taken                                                                                                                                     |
| PBMCs                                                           | Taken                                                                                                                                                                     |
| Liver                                                           | Taken                                                                                                                                                                     |
| Differentiated cells                                            | IMR90 cells taken as one of the representative data                                                                                                                       |

# **Supplementary File 1**

**PBMC: co-occurrence of marks in protein coding gene**

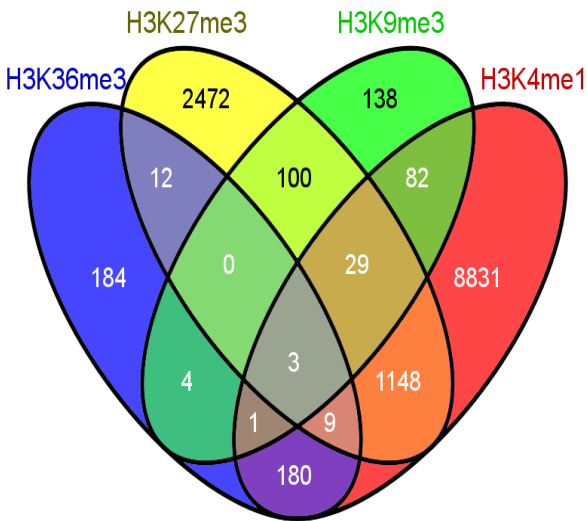

**Liver: co-occurrence of marks in protein coding gene**

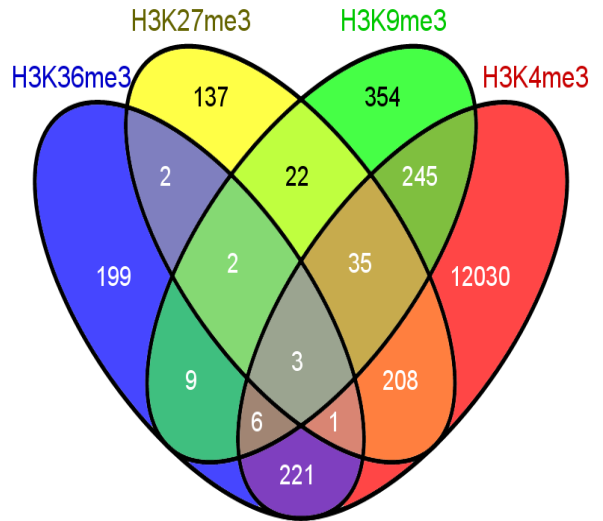

**IMR90: co-occurrence of marks in protein coding gene**

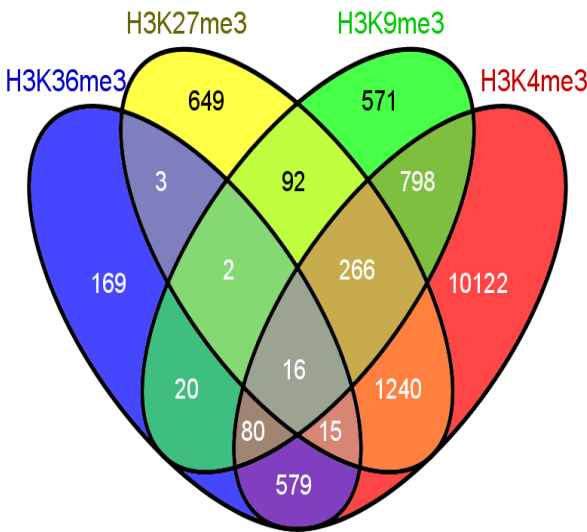

**CD34: co-occurrence of marks in protein coding gene**

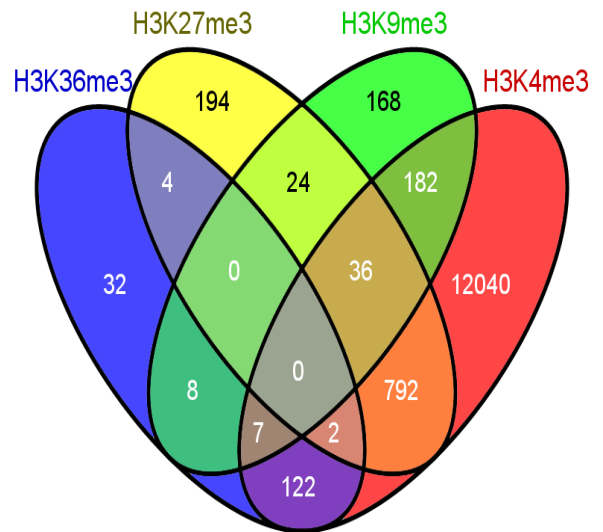

**PBMC: co-occurrence of marks in lncRNA gene**

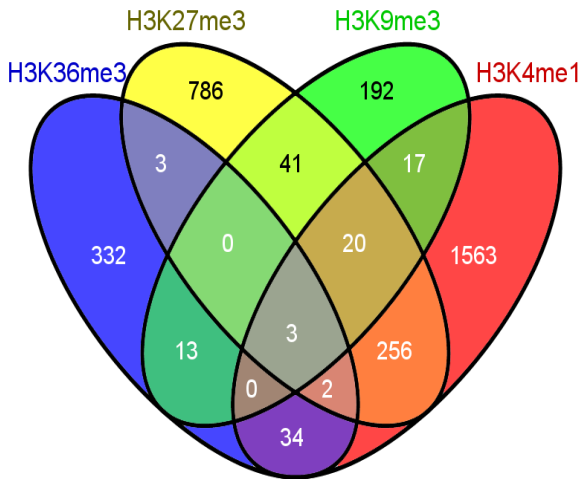

**Liver: co-occurrence of marks in lncRNA gene**

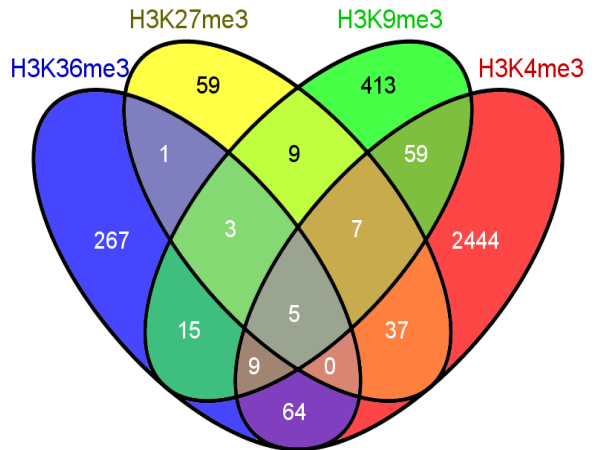

**IMR90: co-occurrence of marks in lncRNA gene**

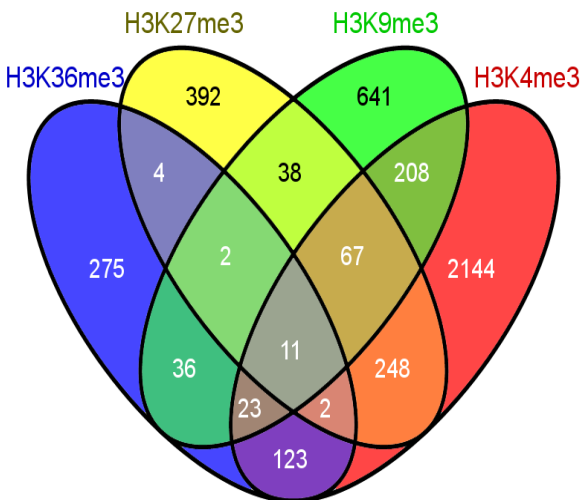

**CD34: co-occurrence of marks in lncRNA gene**

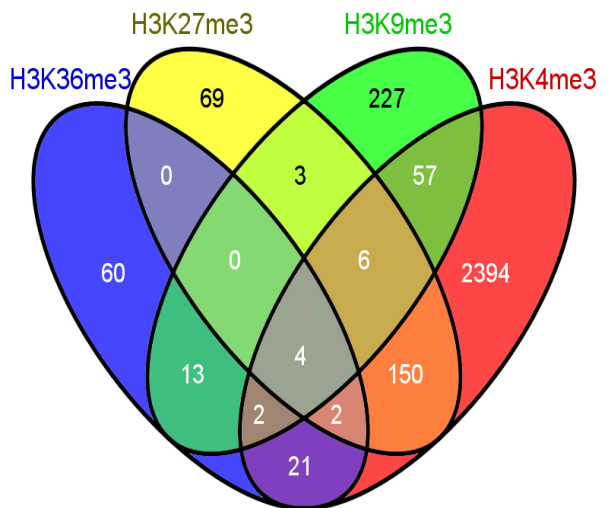



**Brain germinal: co-occurrence of marks in protein coding gene**

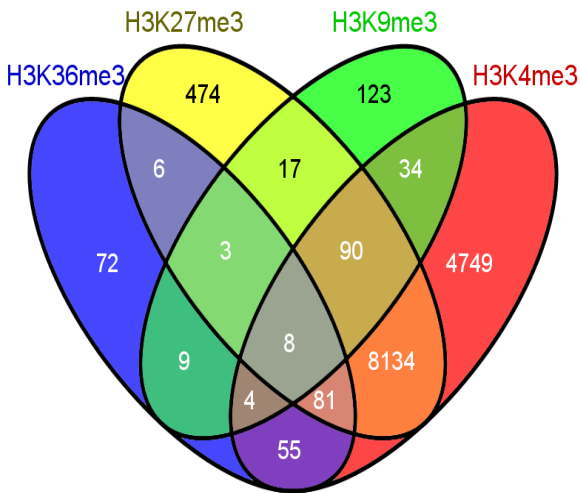

**Brain germinal: co-occurrence of marks in lncRNA gene**

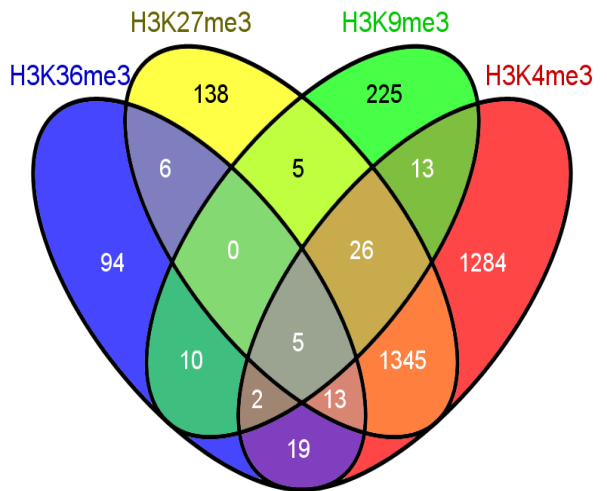

**H1 cell line: co-occurrence of marks in protein coding gene**

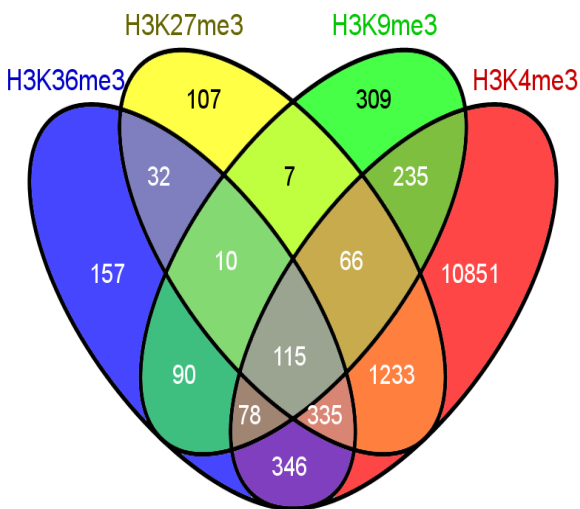

**H1 cell line: co-occurrence of marks in lncRNA gene**

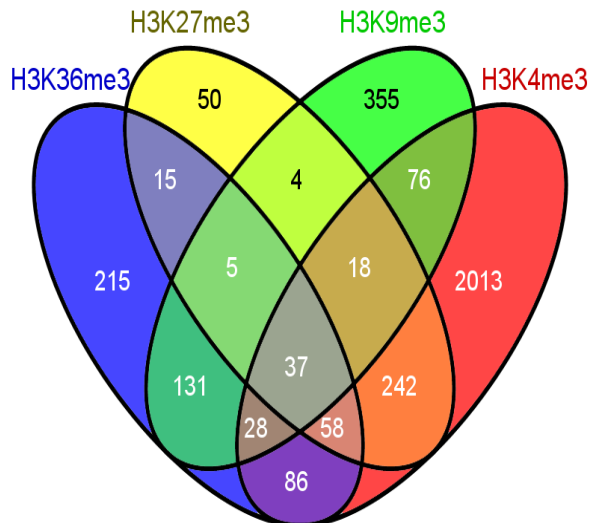

## **Supplementary File 2**

# mRNA coding genes having similar methylation pattern across different cell/tissue types

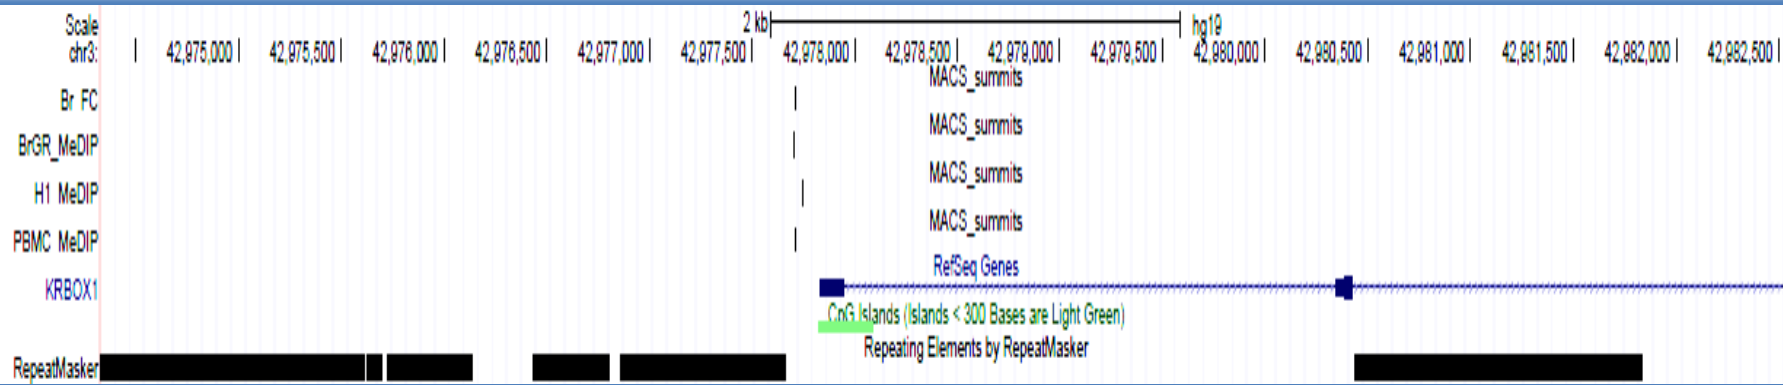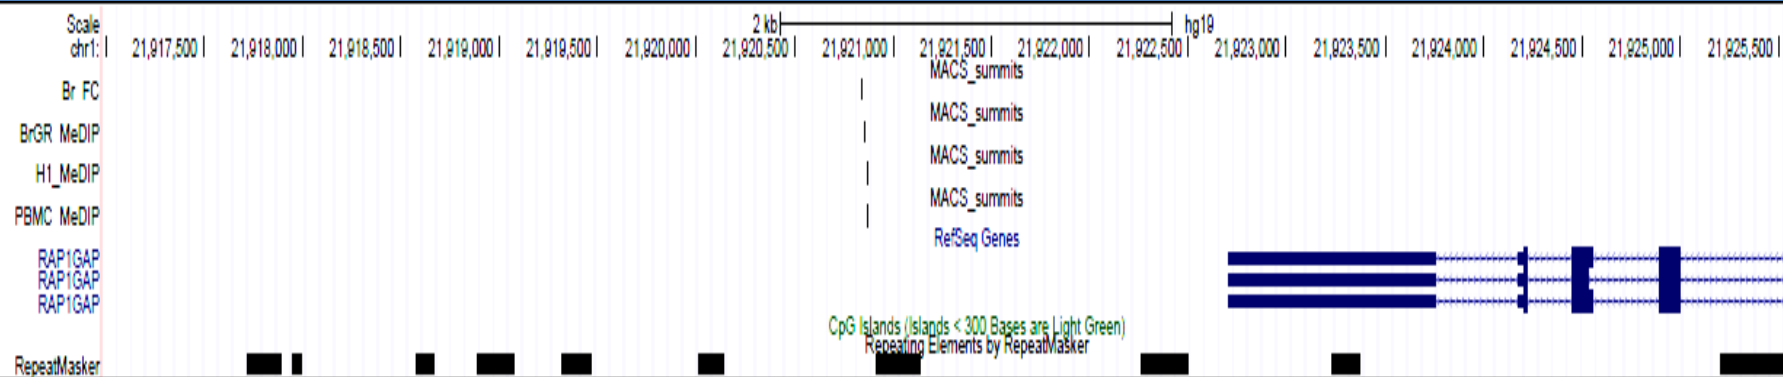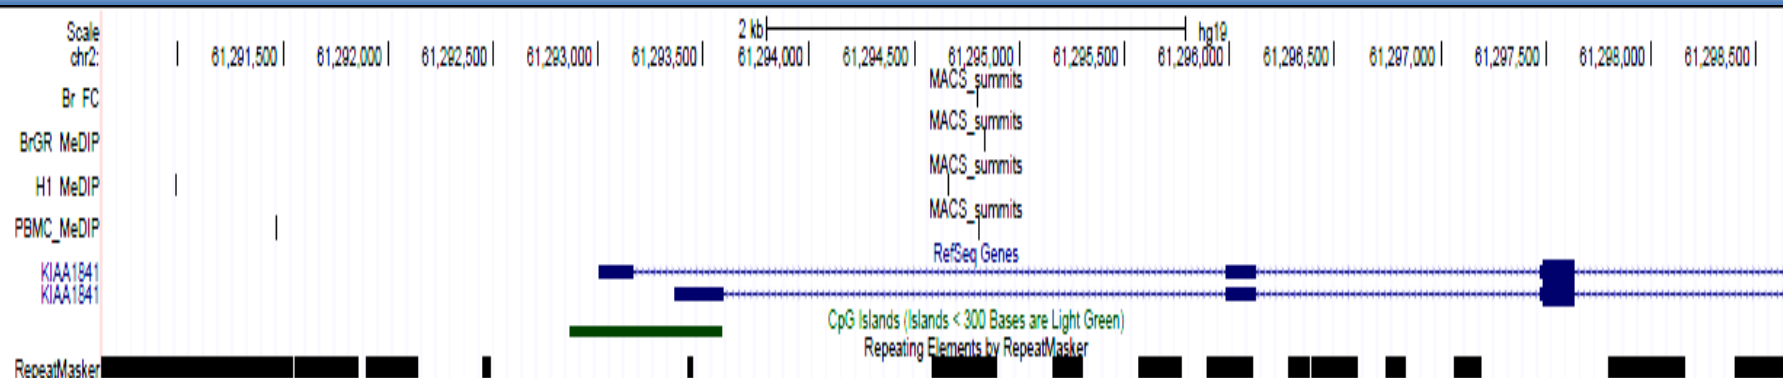

# mRNA coding genes having similar H3K9me3 pattern across different cell/tissue types

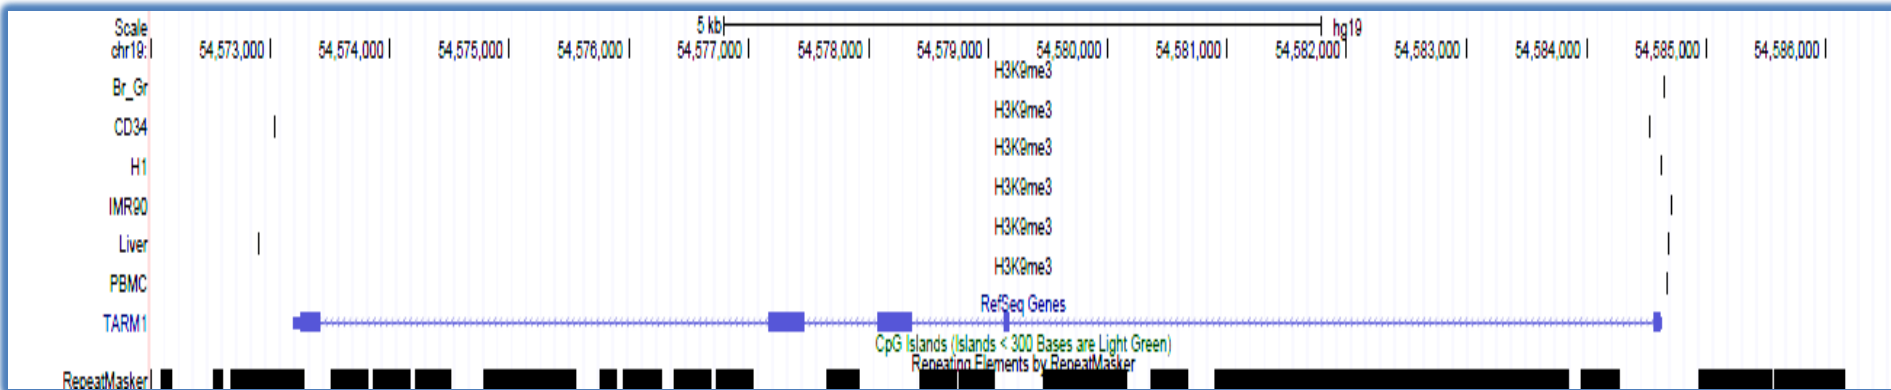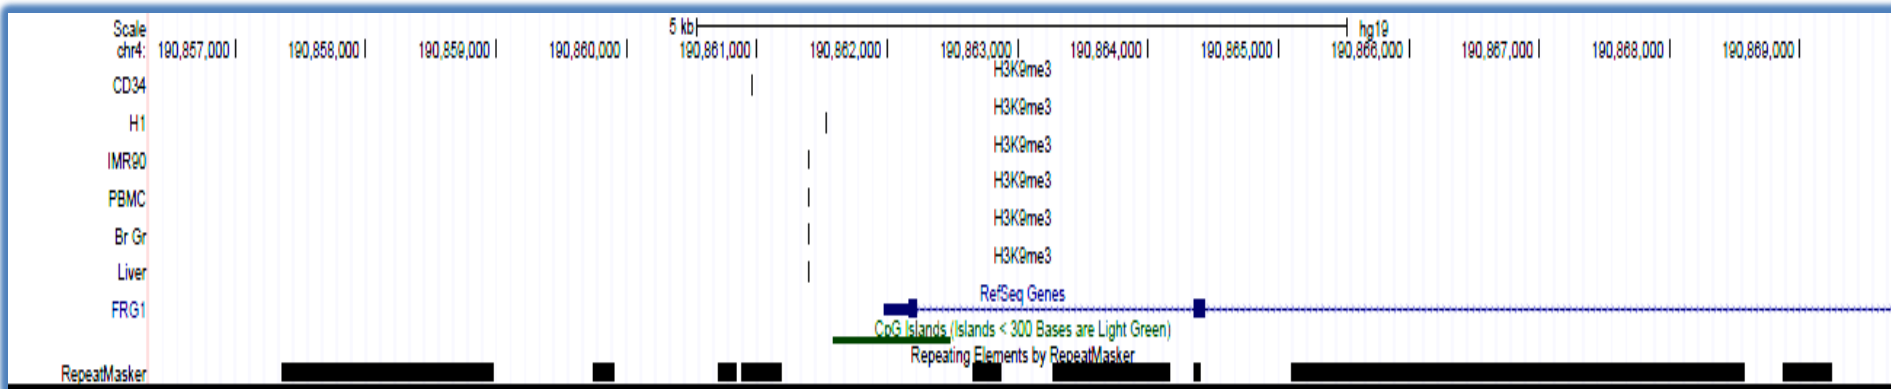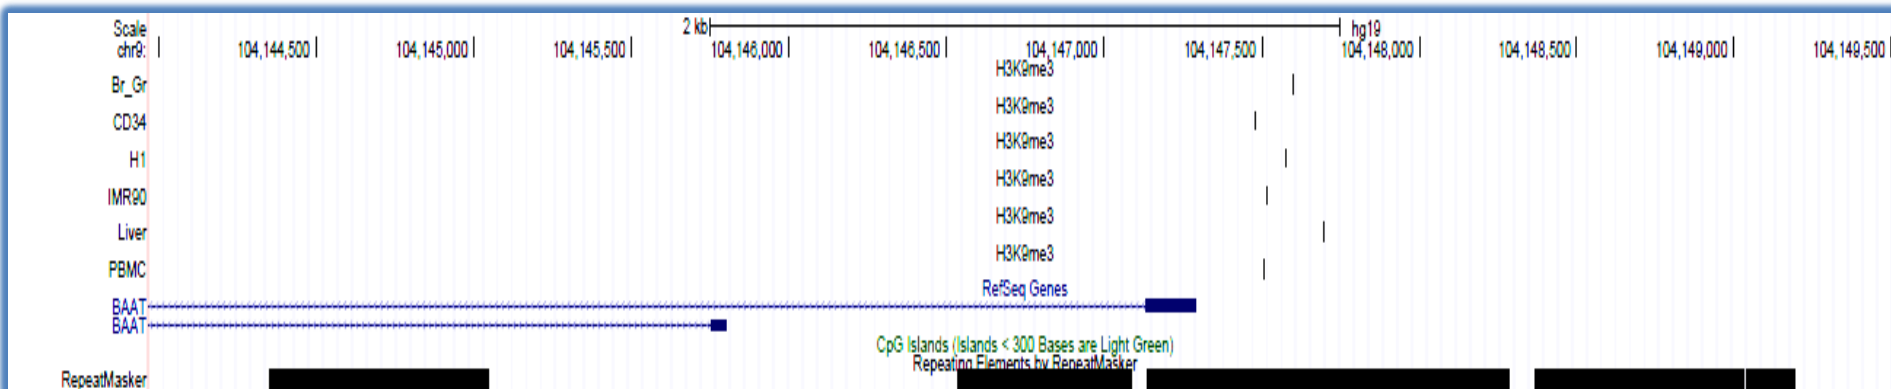

# mRNA coding genes having similar H3K4me3 pattern across different cell/tissue types

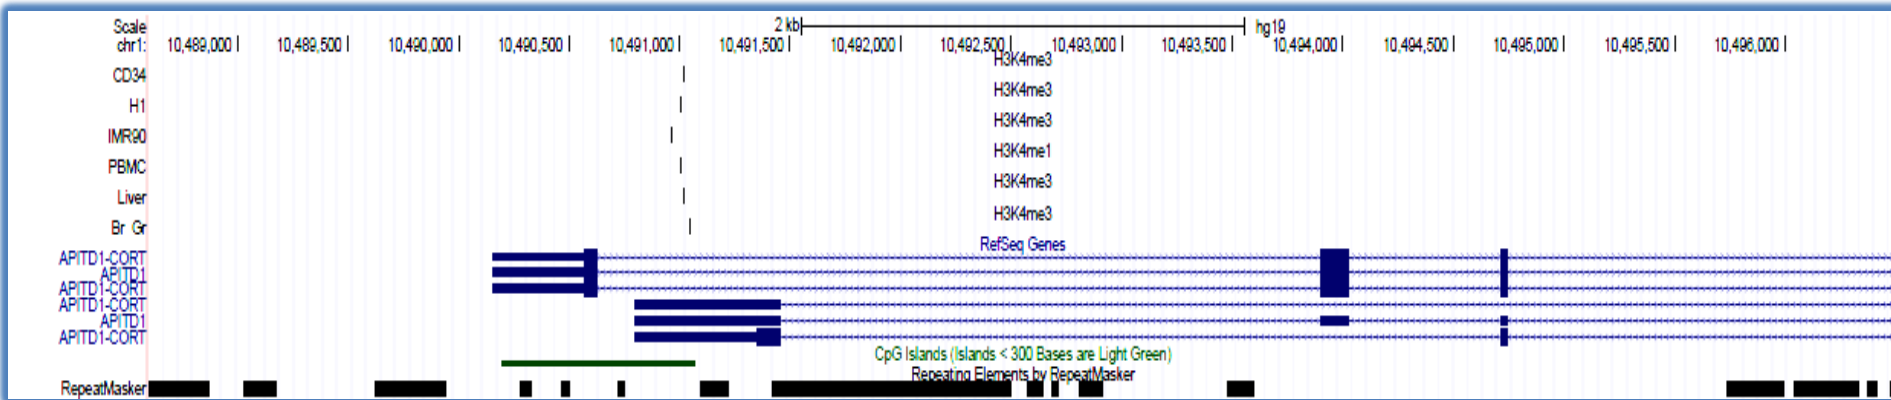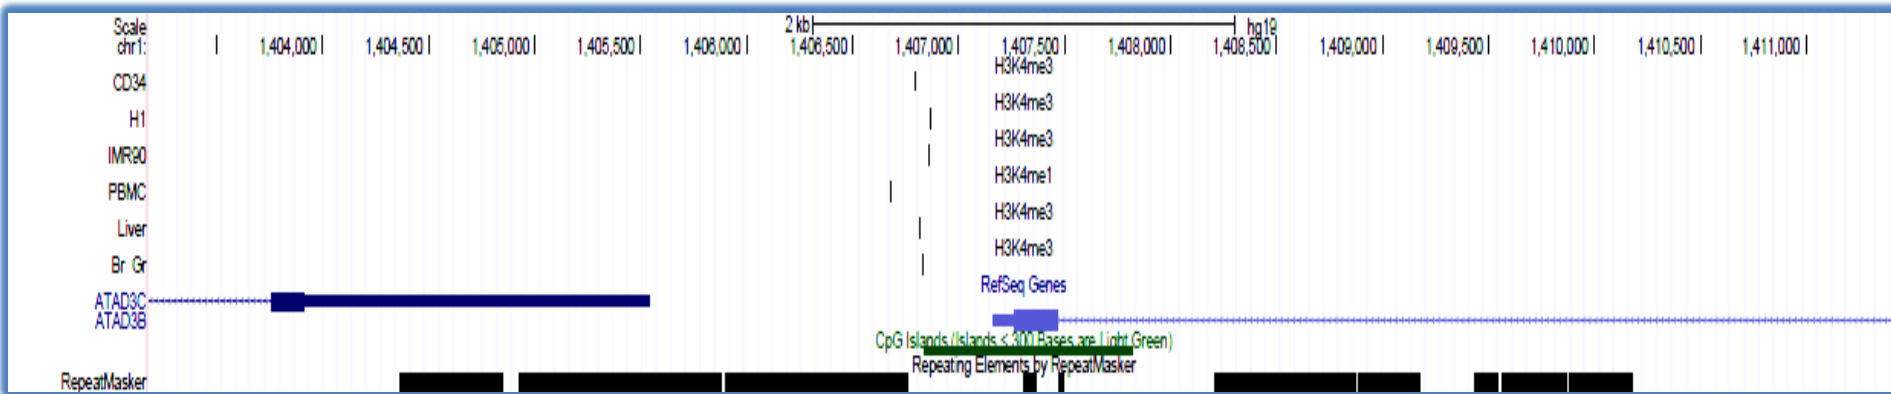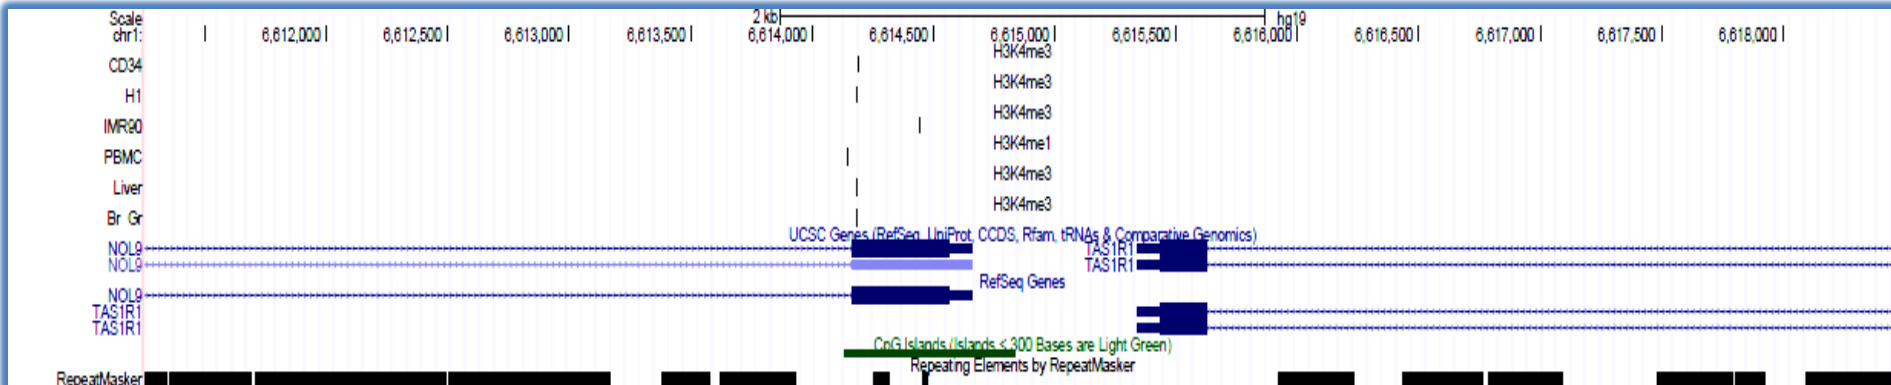

# mRNA coding genes having similar H3K36me3 pattern across different cell/tissue types

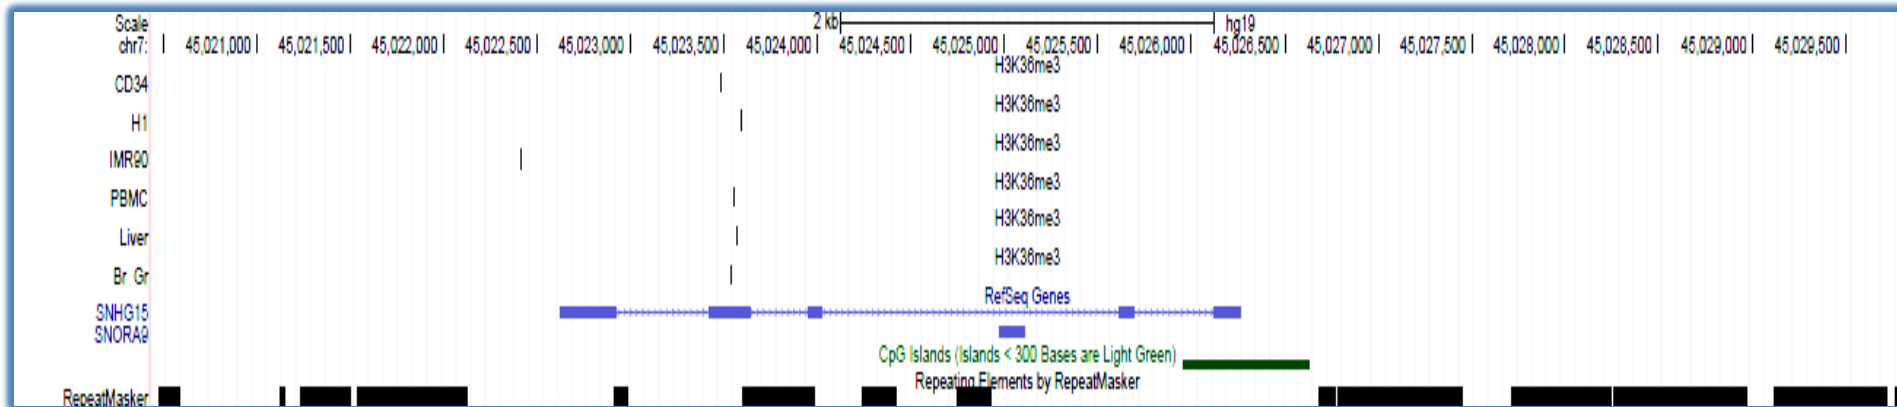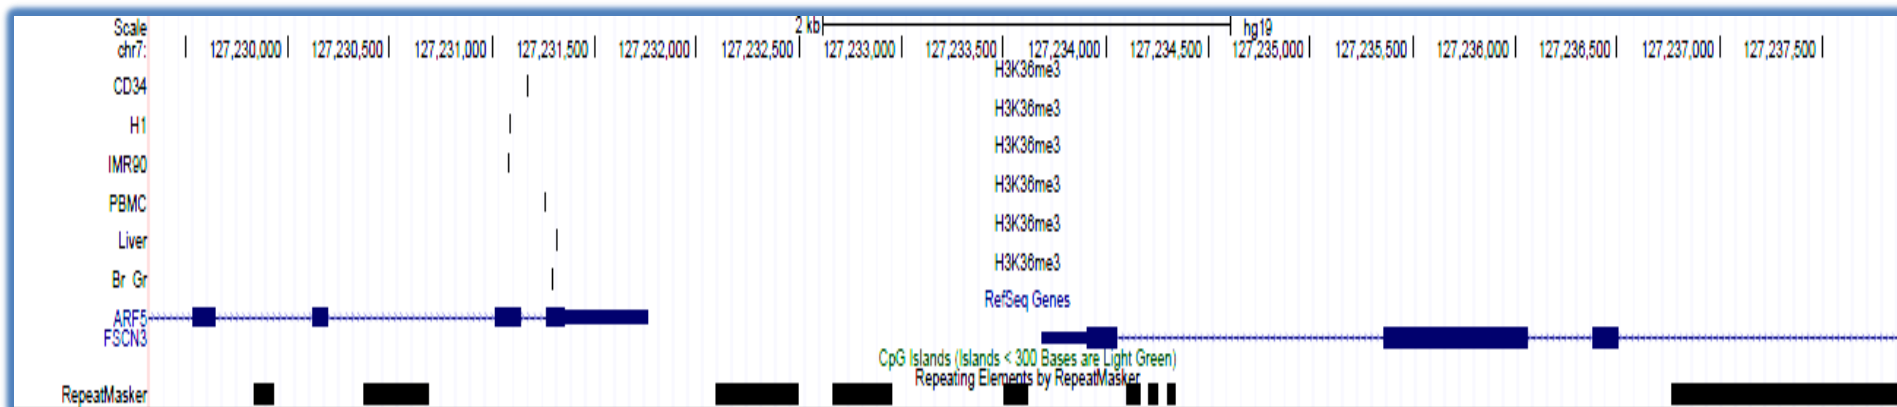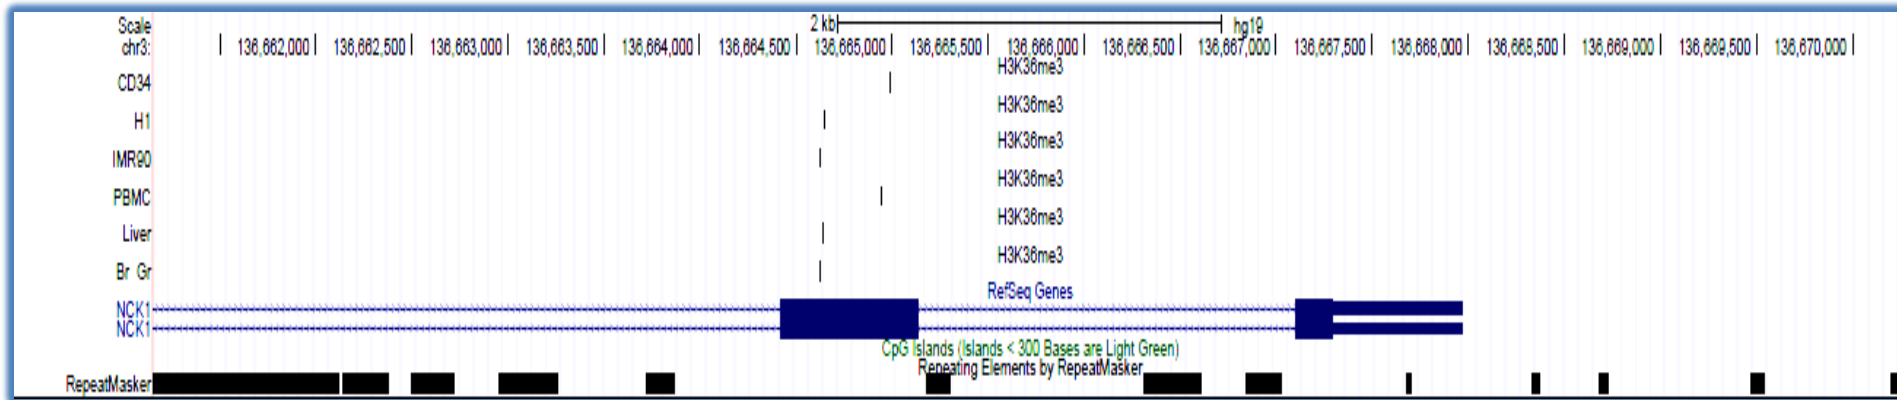

# mRNA coding genes having similar H3K27me3 pattern across different cell/tissue types

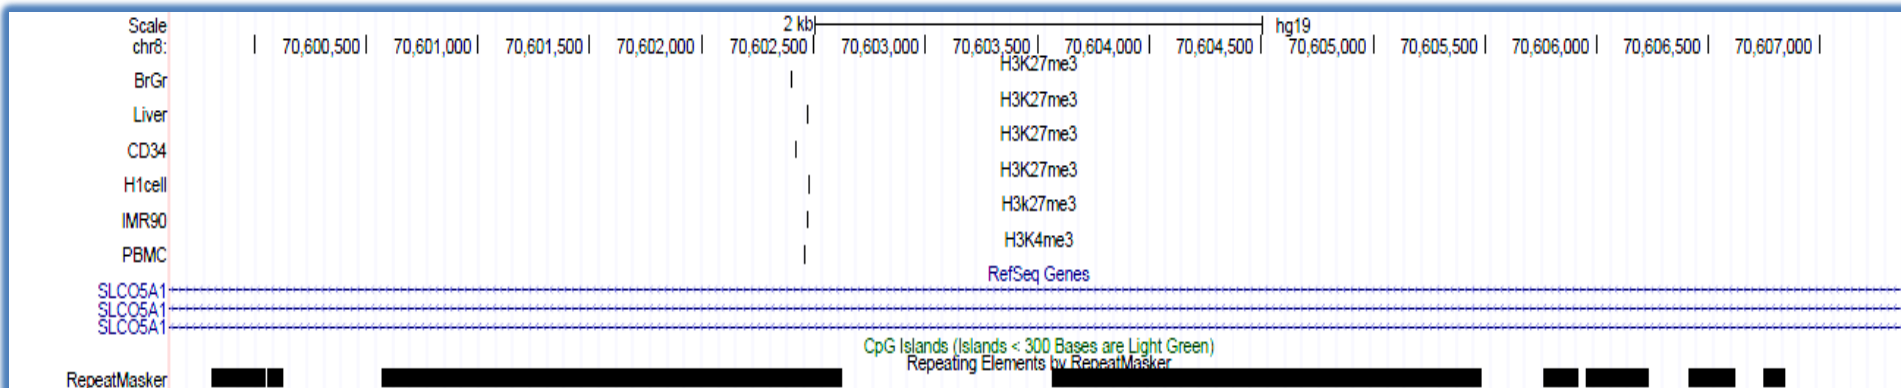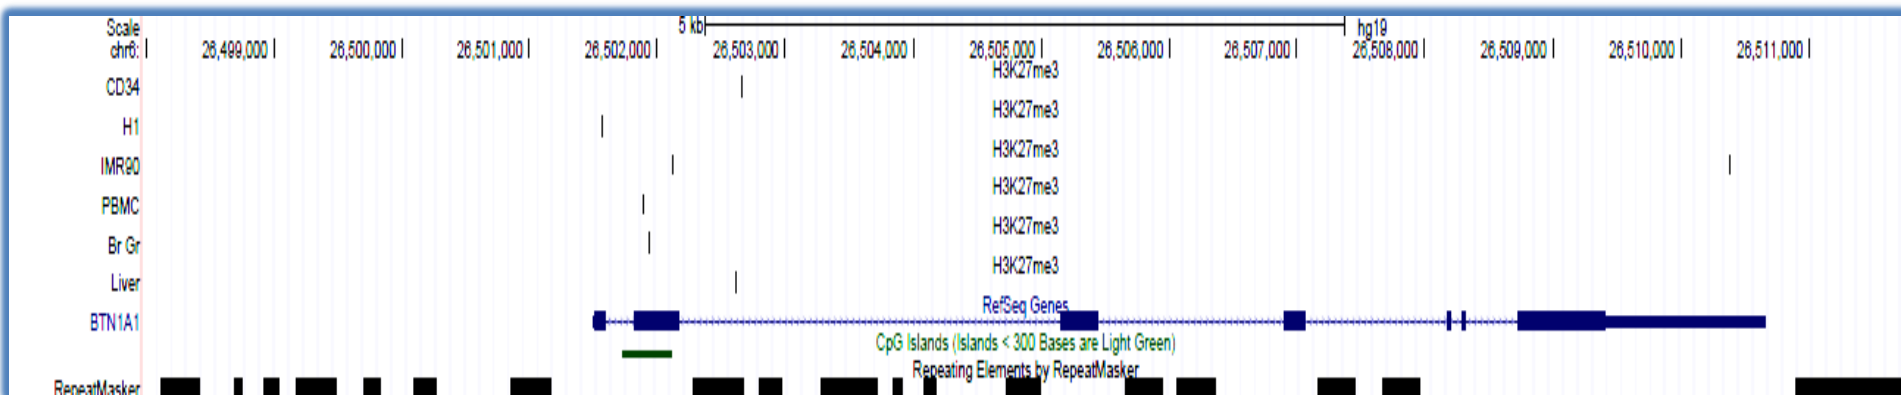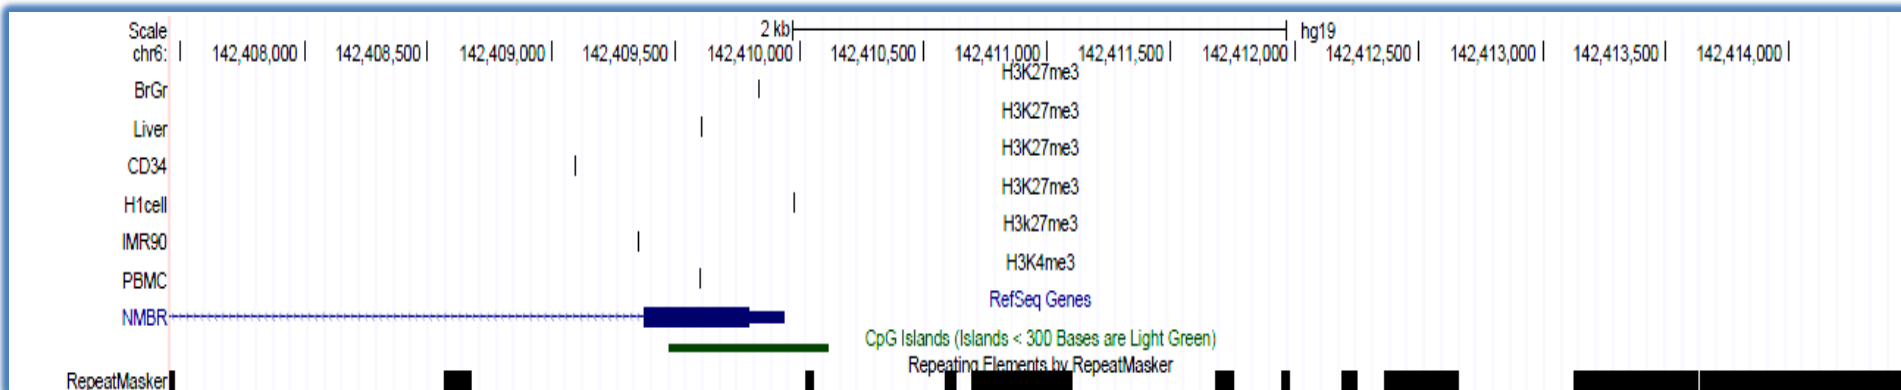

## mRNA coding genes not having methylation marks across different cell/tissue types

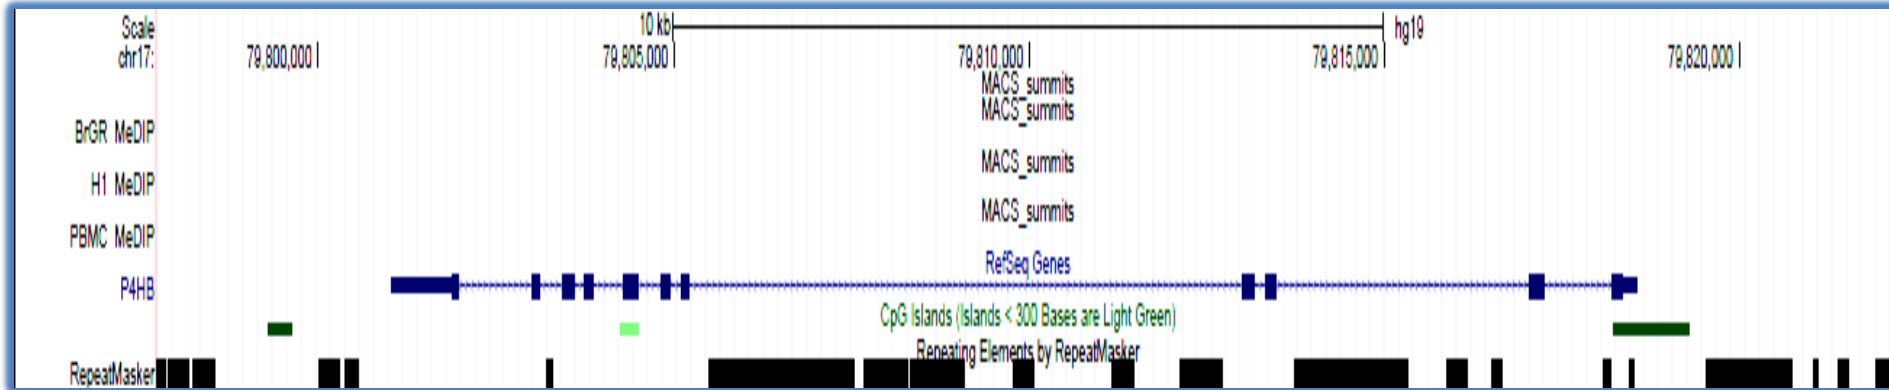

## mRNA coding genes not having H3K36me3 marks across different cell/tissue types

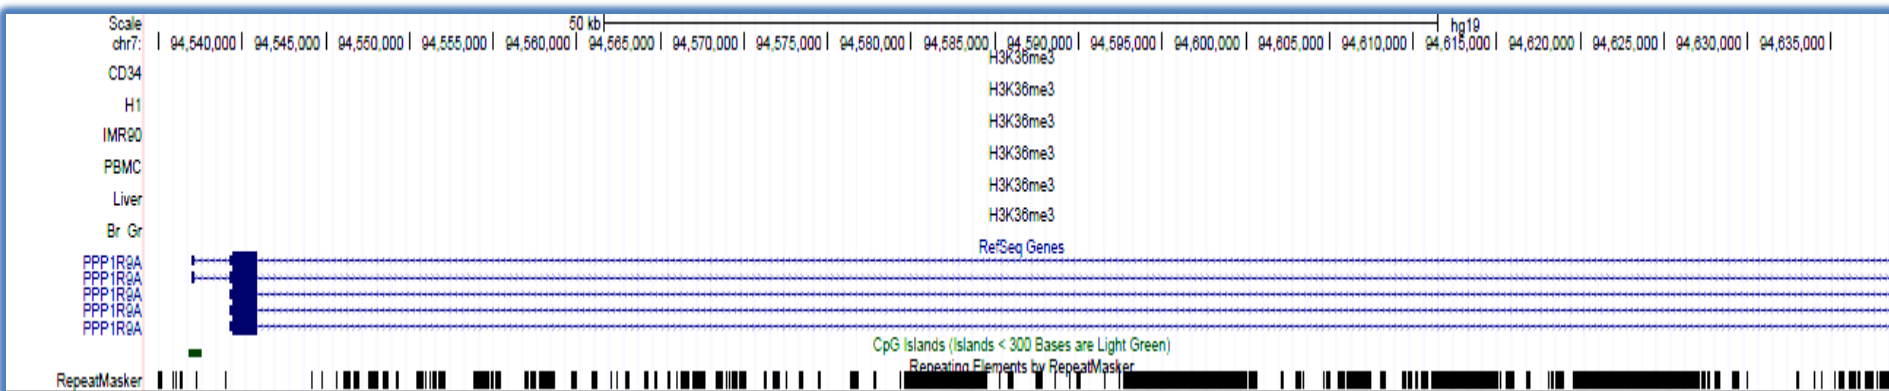



## mRNA coding genes not having H3K27me3 marks across different cell/tissue types

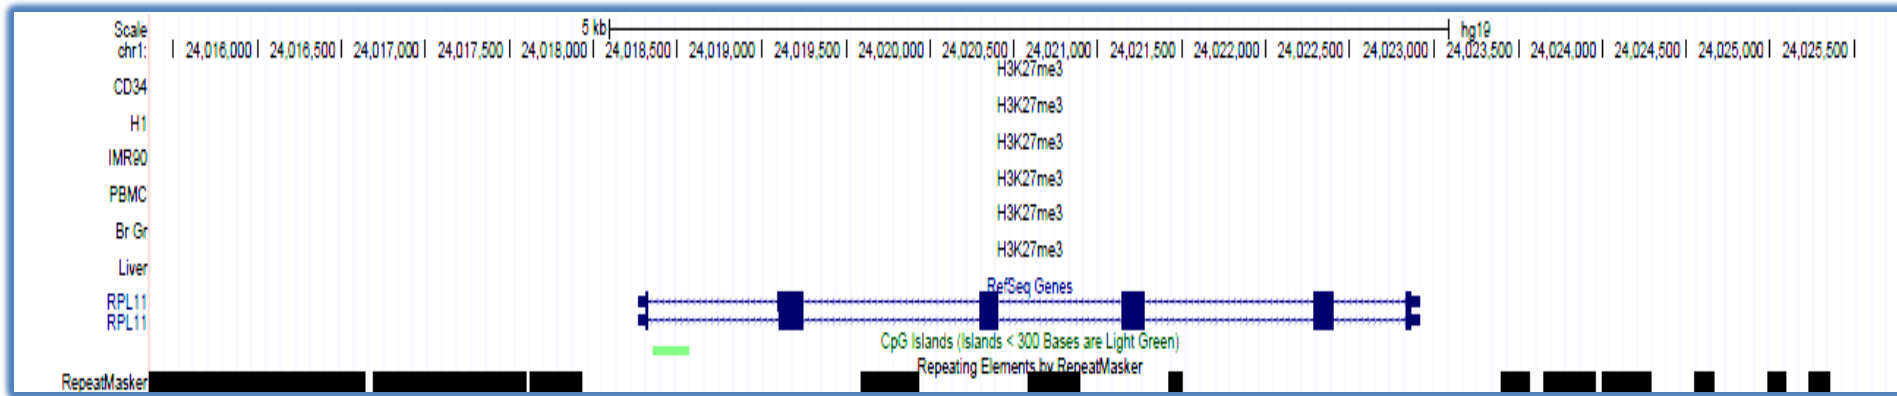

## mRNA coding genes not having H3K4me3 marks across different cell/tissue types

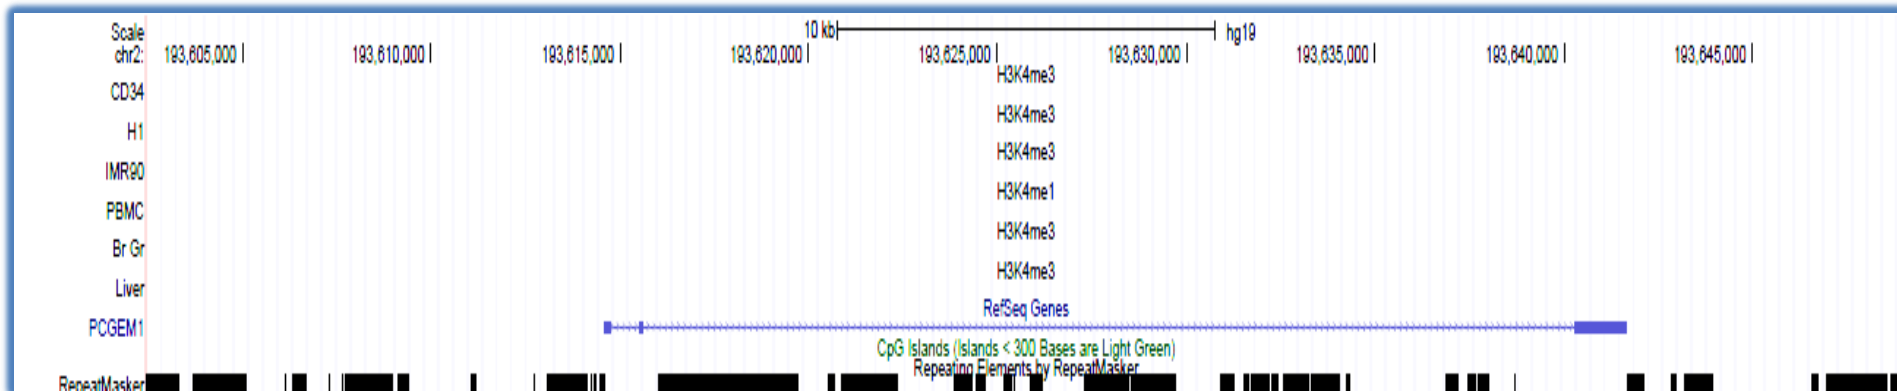

# lncRNA coding regions having similar H3K36me3 pattern across different cell/tissue types

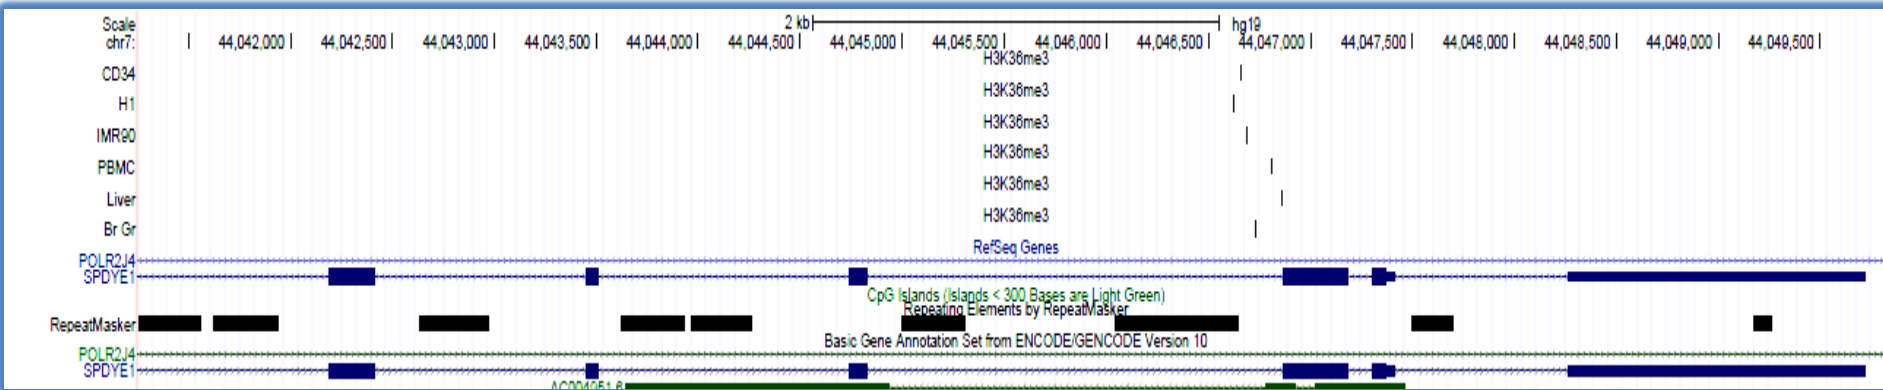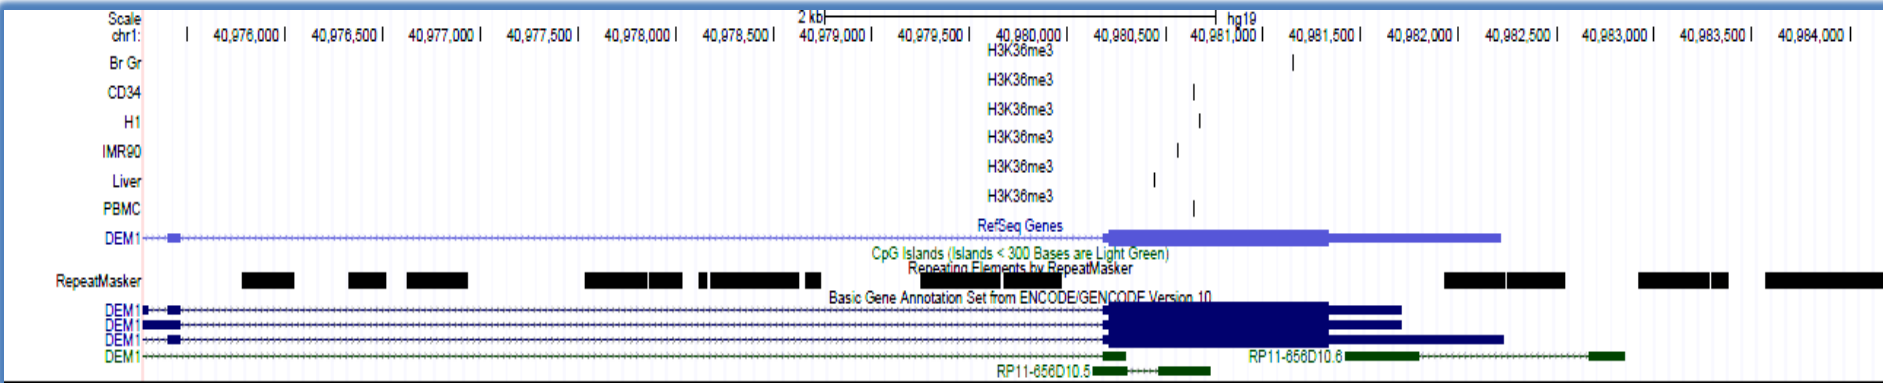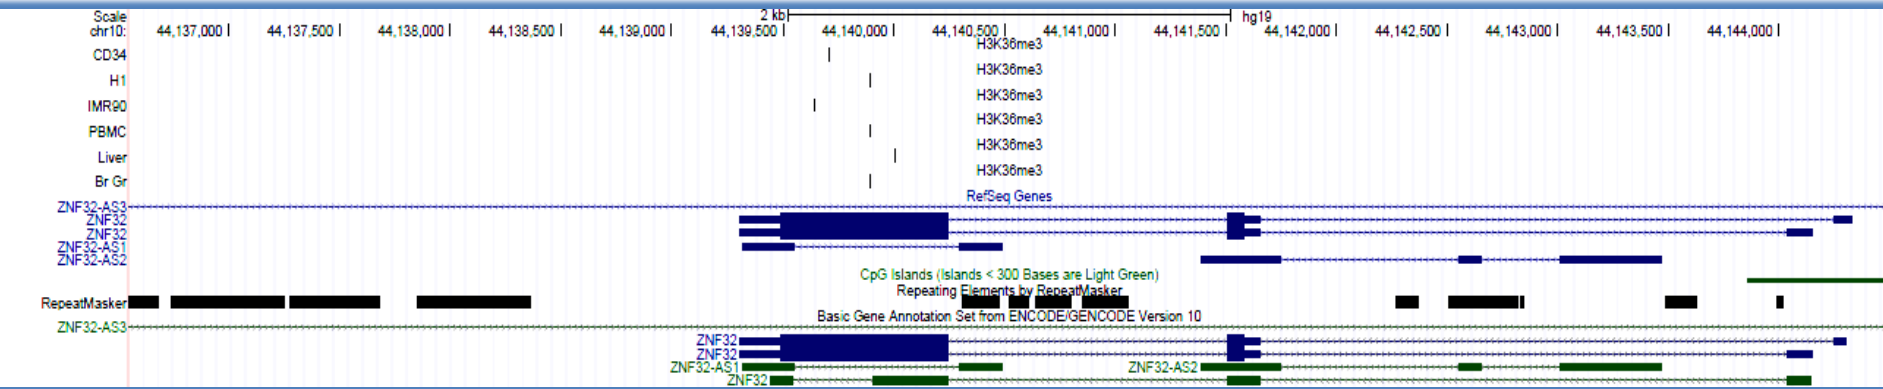

# IncRNA coding regions having similar H3K9me3 pattern across different cell/tissue types

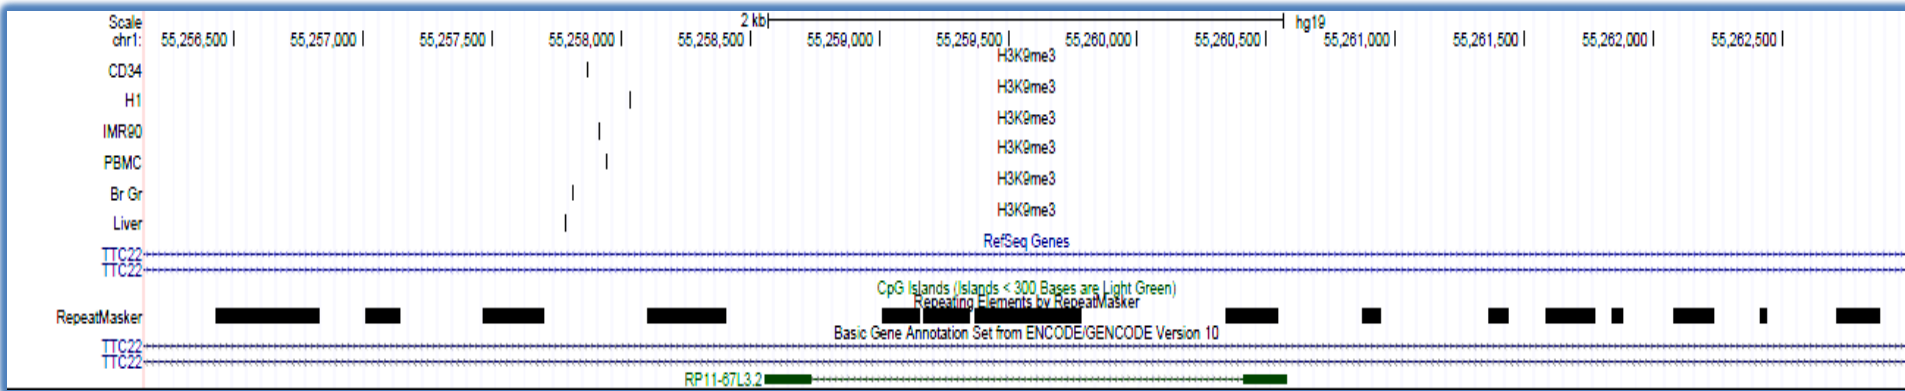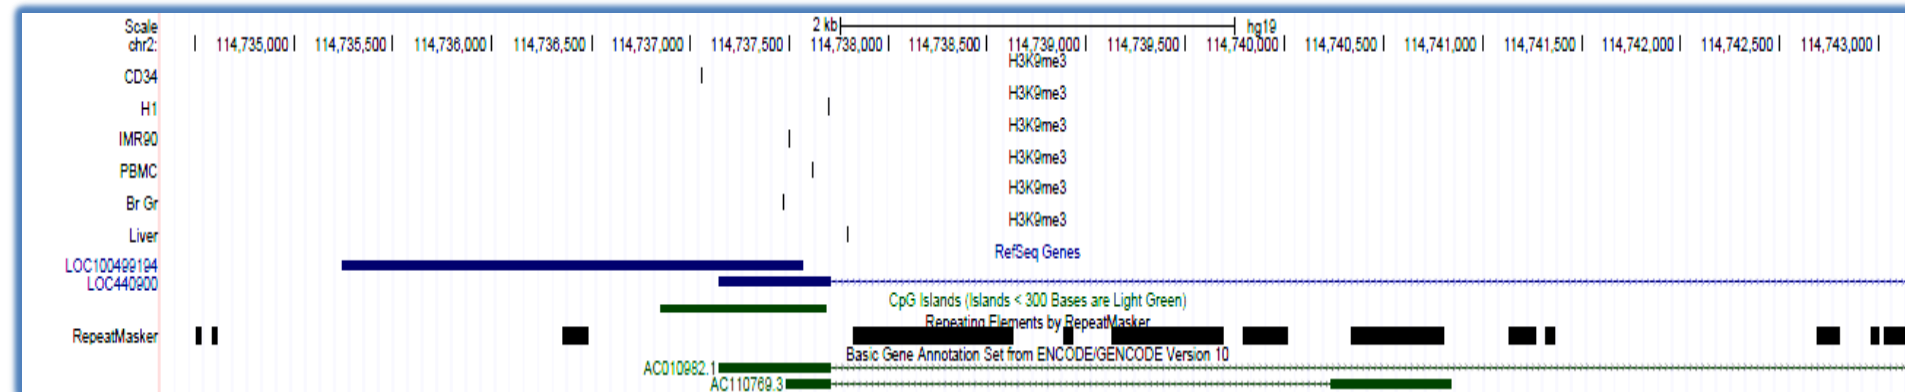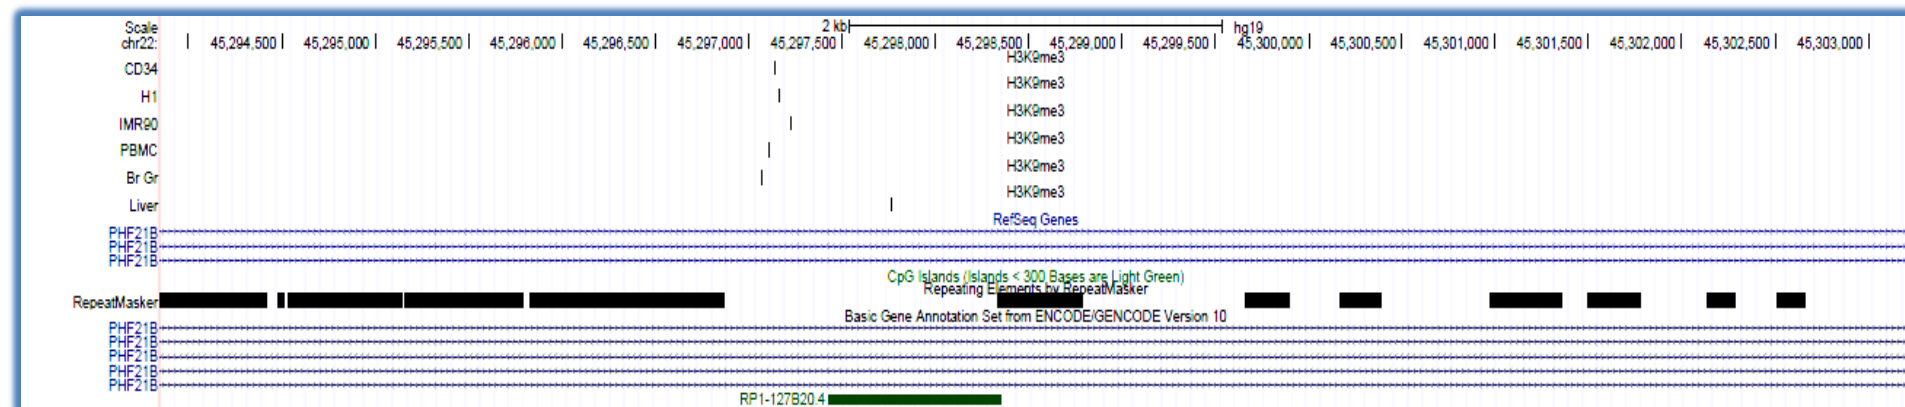

# lncRNA coding regions having similar H3K4me3 pattern across different cell/tissue types

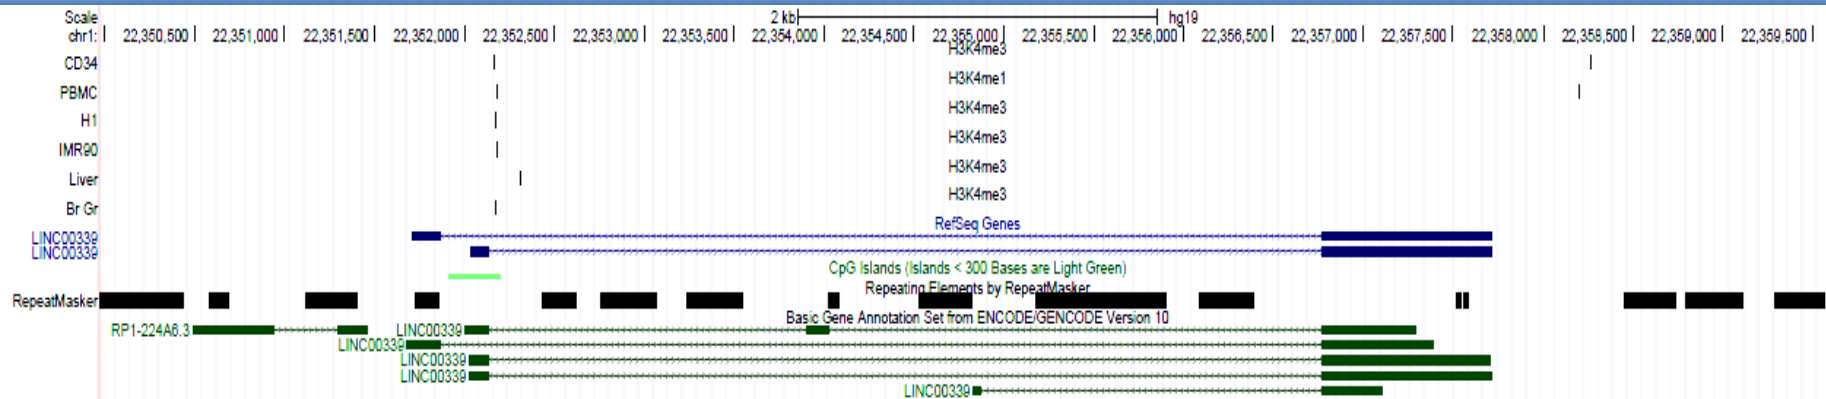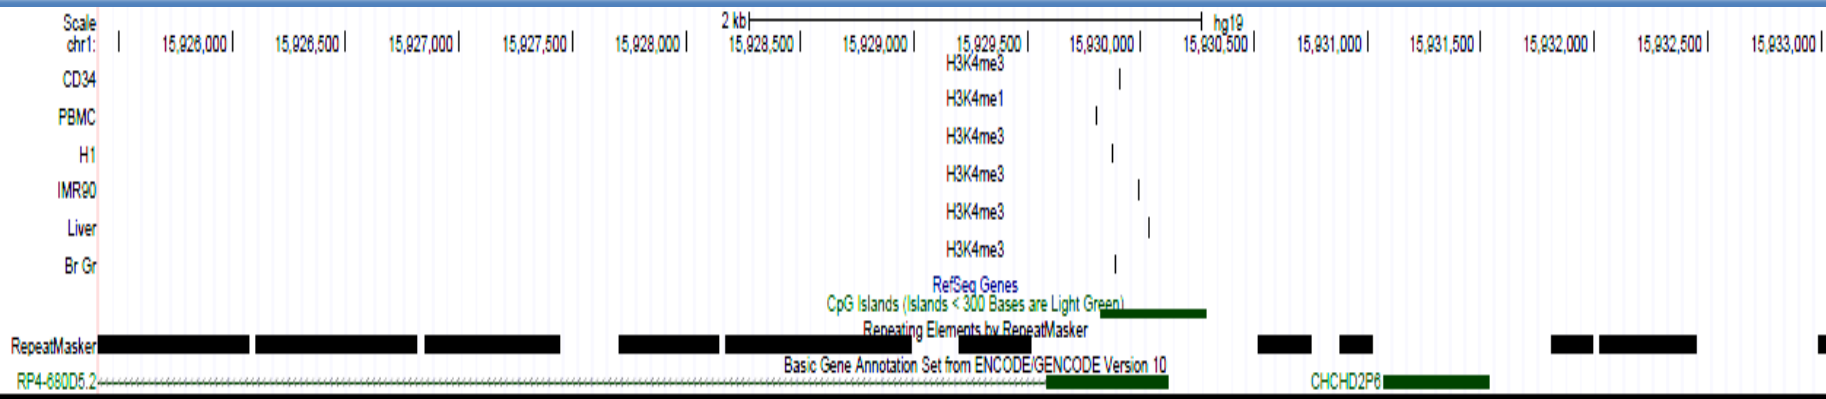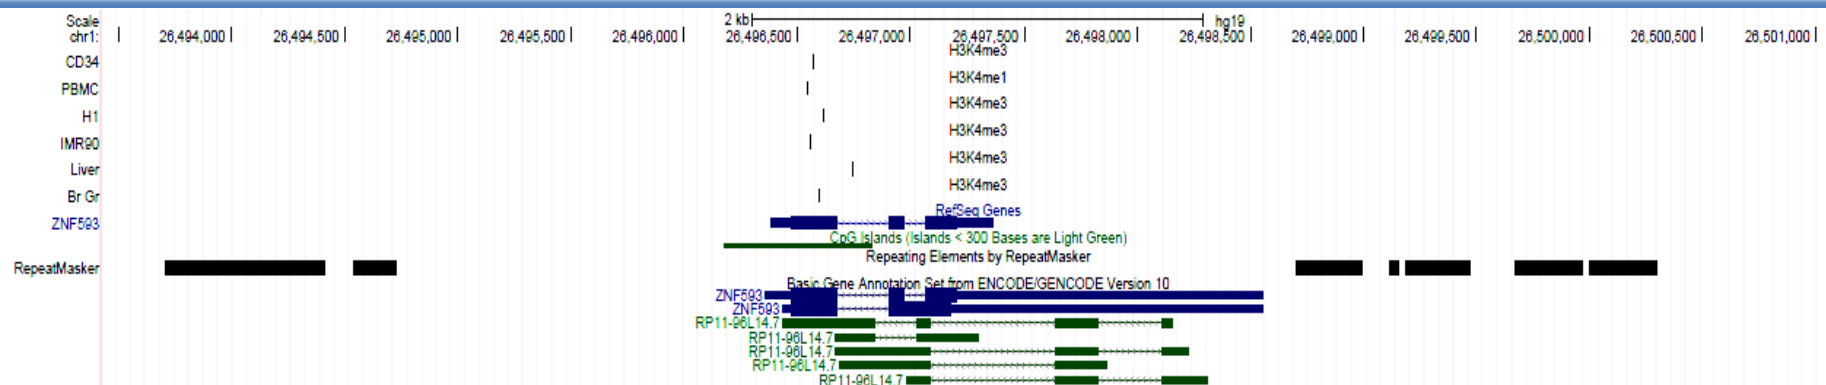

# IncRNA coding regions having similar H3K4me3 pattern across different cell/tissue types

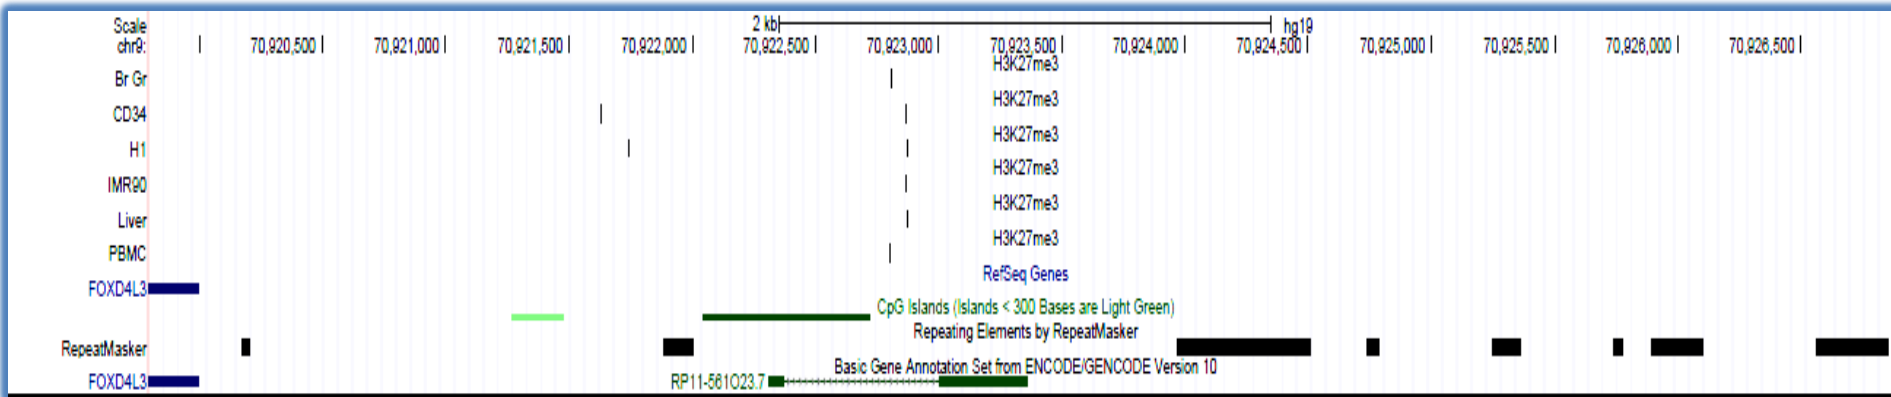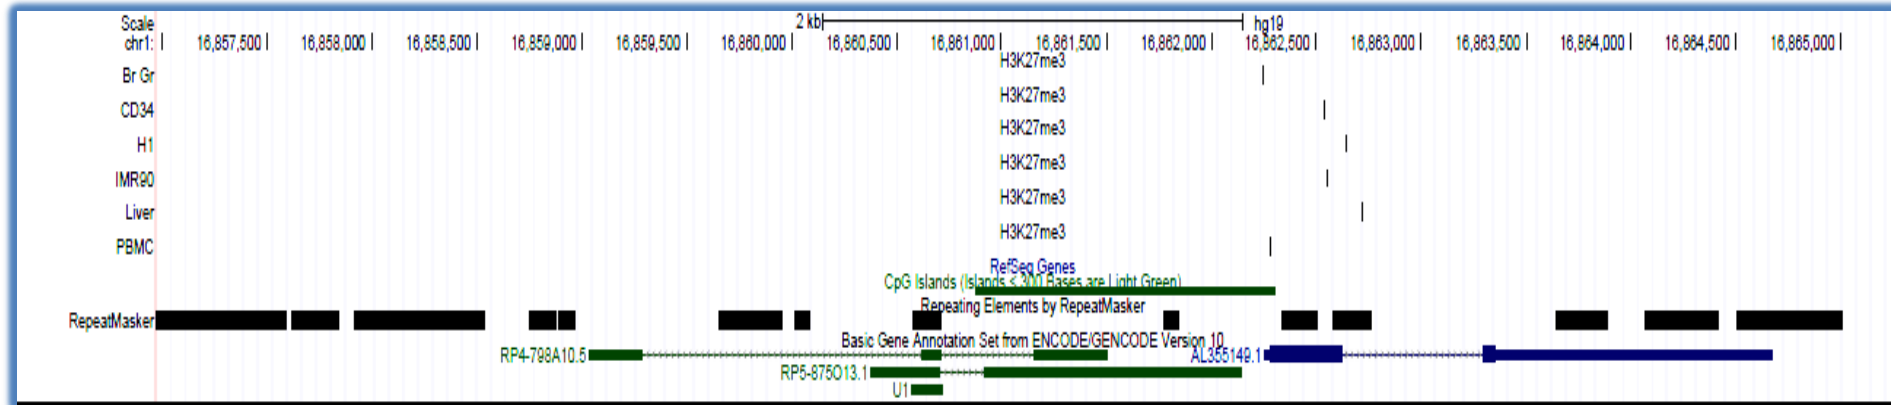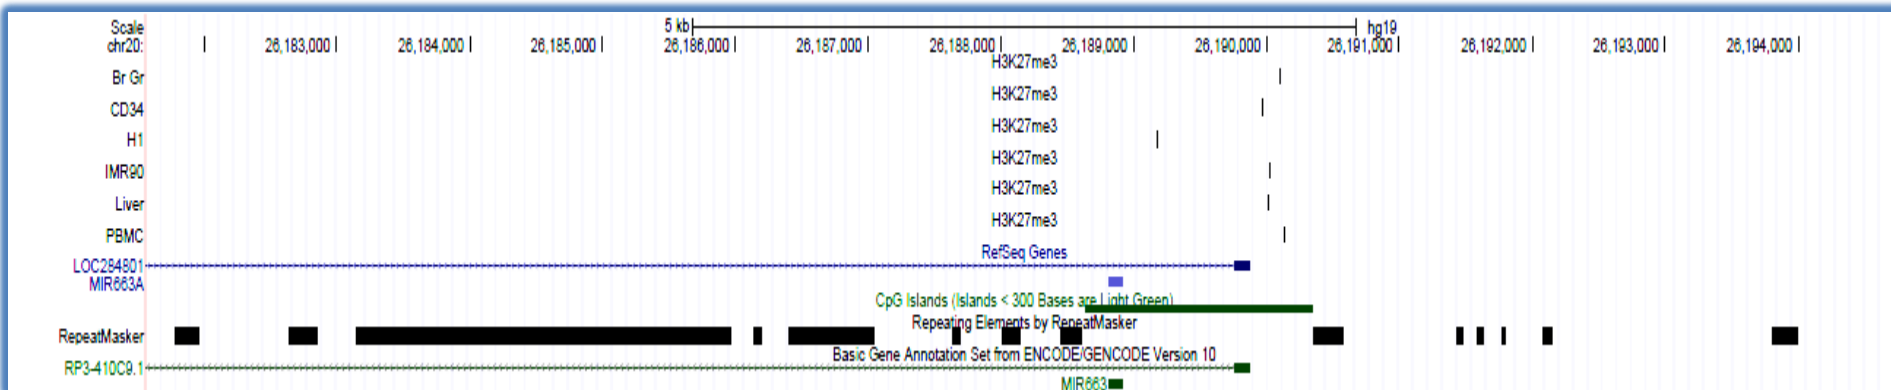

Supplement: supp_gks776_nar-01444-n-2012-File010.pdf [file supp_gks776_nar-01444-n-2012-File010.pdf]
